## 1                                   **Feed-forward inhibition fine-tunes response timing** 2                                   **in auditory-vocal interactions**

3  
4           Philipp Norton<sup>1,2</sup>, Jonathan Benichov<sup>3</sup>, Margarida Pexirra<sup>3</sup>, Susanne Schreiber<sup>1,2</sup>,  
5                                   & Daniela Vallentin<sup>3</sup>

6  
7  
8           <sup>1</sup> Bernstein Center for Computational Neuroscience Berlin, 10115 Berlin, Germany

9           <sup>2</sup> Institute for Theoretical Biology, Humboldt-Universität zu Berlin, 10115 Berlin, Germany

10           <sup>3</sup> Max Planck Institute for Ornithology, 82319 Seewiesen, Germany  
11  
12

13   The ability to regulate vocal timing is a fundamental aspect of communicative  
14   interactions for many species, including conversational speech among humans, yet  
15   little is known about the neural circuitry that regulates the input-dependent timing of  
16   vocal replies. Exploring this topic in the zebra finch premotor area HVC, we identify  
17   feed-forward inhibition as a key regulator of vocal response timing. Based on a spiking  
18   network model informed by behavioral and electrophysiological data from  
19   communicating zebra finches, we predicted that two different patterns of inhibition  
20   regulate vocal-motor responses. In one scenario, the strength of production-related  
21   premotor inhibition translates into plasticity in vocal response delays. In the other  
22   scenario, fast transient interneuron activity in response to auditory input results in the  
23   suppression of call production while a call is heard, thereby reducing acoustic overlap  
24   between callers. Extracellular recordings in HVC during the listening phase confirm  
25   the presence of auditory-evoked response patterns in putative inhibitory interneurons,  
26   along with corresponding signatures of auditory-evoked activity suppression. The  
27   proposed model provides a parsimonious framework to explain how auditory-vocal  
28   transformations can give rise to vocal turn-taking and highlights multiple roles of local  
29   inhibition for behavioral modulation at different time scales.

## 30 INTRODUCTION

### 31 *Behavioral Importance of Vocal turn-taking*

32 A defining characteristic of spoken conversations is the alternating exchange of  
33 vocalizations, often with rapid transitions between speakers and minimal overlap of  
34 speech (Levinson, 2016). This example of vocal turn-taking requires precise control of  
35 the onsets of vocalizations, with individual speakers typically responding to their  
36 conversational partners within ~250 ms, although average speeds can vary across  
37 linguistic cultures (Stivers et al., 2009).

38  
39 The ability to coordinate vocalizations in an interspersed manner precedes spoken  
40 language developmentally and evolutionarily, extending to other species ranging from  
41 non-human primates to birds and frogs (Pika et al., 2018). In all cases, vocal  
42 interactions generally require perceiving relevant acoustic signals and initiating exact  
43 motor commands to generate an appropriate vocal reply. In the case of vocal turn-  
44 taking, each interlocutor delays or withholds a response while listening to the other.  
45 This social form of sensorimotor coordination reduces acoustic overlap, thereby  
46 maintaining unmasked signal transmission and detection. Although this behavior is  
47 wide-spread, little is known about how brain circuits flexibly control whether and when  
48 to respond to a partner's vocalizations.

49

### 50 *Forebrain control of coordinated vocal timing in zebra finches*

51 The zebra finch has served as a tractable model system for studying the  
52 neuroethology of developmental vocal learning (Immelmann, 1968; Scharff &  
53 Nottebohm, 1991; Zann, 1996; Tchernichovski et al., 2001). Due to their distributed  
54 nucleated brain architecture (Nottebohm et al., 1976) songbirds are particularly well  
55 suited to study the dedicated neural circuits underlying vocal learning and production  
56 (Hahnloser et al., 2002; Brainard & Doupe, 2002; Long et al., 2010; Okubo et al., 2015;  
57 Vallentin et al., 2016). The vocal-motor pathway has been studied extensively to  
58 understand the neural mechanisms underlying production of courtship song, which  
59 male zebra finches perform in a uni-directional rather than turn-taking manner.  
60 Recently, the convergence of behavioural, anatomical, and electrophysiological  
61 evidence has indicated that the zebra finch forebrain "song system" is not solely  
62 dedicated to the learned performance of complex courtship song, but that the  
63 descending forebrain vocal-motor pathway is also involved in the production of  
64 acoustically simpler innate affiliative calls (Hahnloser et al., 2002; Ter Maat et al.,  
65 2014; Benichov et al., 2016; Shaughnessy et al., 2019; Benichov & Vallentin, 2020;  
66 Ma et al., 2020).

67 Zebra finches engage in pair-specific antiphonal exchanges of short calls, often  
68 coordinating calls with one-another within the context of a larger group (Gill et al.,  
69 2015; Ter Maat et al., 2014; Elie & Theunissen, 2020). This example of vocal turn-  
70 taking requires precise regulation of call timing relative to the calls of others. In  
71 controlled settings, birds can be driven to adapt their call timing to avoid "jamming"  
72 (i.e. overlapping with) the calls of another bird or temporally predictable call playbacks  
73 (Benichov et al., 2016; Benichov & Vallentin, 2020). Blocking the influence of the  
74 forebrain vocal-motor pathway by lesioning the song system output nucleus RA  
75 (Robust nucleus of the Arcopallium) or through pharmacological inactivation of the

76 directly upstream premotor nucleus HVC (proper name) drastically impairs the  
77 temporal precision of the call response and consequently, jamming avoidance.

78 Electrophysiological recordings within the vocal-motor pathway of awake-behaving  
79 birds have identified bursts of activity in HVC premotor neurons related to call onsets  
80 (Hahnloser et al., 2002; Ter Maat et al., 2014; Benichov & Vallentin, 2020; Ma et al.,  
81 2020). Results from intracellular recordings have implicated the inhibitory activity of  
82 HVC interneurons in modulating the sparse bursting of premotor projection neurons  
83 that appear to trigger call production. Furthermore, pharmacological manipulation of  
84 local inhibition within HVC has profound effects on calling behavior, with disinhibition  
85 resulting in significantly faster call response latencies (Benichov & Vallentin, 2020).  
86 Here we utilize these previously observed data along with new extracellular recordings  
87 in awake birds listening to call playbacks to provide the empirical basis for a  
88 mathematical model of a vocal timing control circuit.

89

### 90 ***Modelling a vocal timing control circuit***

91 While the previous experimental results (Ma et al., 2020; Benichov et al., 2016) imply  
92 the involvement of HVC in controlling the timing of calls in vocal interactions, the exact  
93 functional interplay between identified cell types within this circuitry is unknown. In this  
94 study we developed a leaky integrate-and-fire (LIF) neuron-based spiking network  
95 model composed of HVC premotor and interneurons as well as upstream auditory  
96 neurons and evaluated the plausibility of connectivity profiles and circuit mechanisms  
97 in terms of their consistency with experimental observations.

98 The proposed mathematical model of HVC's involvement in call perception and timing  
99 allowed us to systematically explore multiple components of this vocal circuit: 1) The  
100 interplay between excitatory drive and local inhibition; and 2) the interactions between  
101 sensory input during listening and premotor output that leads to a vocalization. The  
102 interpretation of experimental data can be limited by the need to align and analyze  
103 activity in relation to either an incoming auditory stimulus or the vocalization, potentially  
104 obscuring potential interactions between the two. This model provides a more flexible  
105 framework, enabling the direct simulation of experimentally less tractable conditions  
106 including circuit connectivity, helping us to dissect the roles of specific circuit  
107 components in the control of vocal response timing. Specifically, the generation of  
108 multiple scenarios in which premotor activity occurs at different time points relative to  
109 an arriving auditory stimulus enabled us to derive a plausible mechanism for how  
110 inhibition regulates call onset times that proved consistent with subsequent  
111 experimental test based on the model's predictions.

## 112 RESULTS

### 113 *A spiking network model for call production-related activity in HVC*

114 We developed a spiking network model consisting of leaky integrate-and-fire neurons  
115 connected through bi-exponential current-based synapses (Roth & van Rossum,  
116 2010; p. 143) with the initial aim of accurately replicating the call-related activity of  
117 HVC premotor neurons and interneurons (Benichov & Vallentin, 2020) on a  
118 microcircuit level. Compared to more biophysically realistic Hodgkin-Huxley type  
119 neuron models, LIF models have fewer parameters and are more computationally  
120 efficient in numerical simulations. Integrate-and-fire neurons have previously been  
121 successfully applied in modeling of HVC activity during song production (Li &  
122 Greenside, 2006; Cannon et al., 2015; Hamaguchi et al., 2016). Here, the intrinsic  
123 neuronal properties, as well as synaptic weights and time constants, were fit to data  
124 from electrophysiological studies of zebra finch HVC (Table 1 & 2; Mooney & Prather,  
125 2005; Kosche et al., 2015; Hamaguchi et al., 2016).

126 Intracellular recordings of identified RA-projecting premotor neurons in HVC ( $HVC_{(RA)}$ ;  
127 Benichov & Vallentin, 2020; henceforth referred to as ‘premotor neurons’) have  
128 revealed that they either exhibit a burst of action potentials ( $2.4 \pm 1.2$  spikes per burst,  
129 mean  $\pm$  std; average burst onset: -45 to 33 ms relative to call onset) or are  
130 hyperpolarized (onset of hyperpolarization:  $-52 \pm 14$  ms) shortly before the onset of a  
131 produced call (Figure 1A). The model simulated the activity of a representative cell  
132 from the set of call-bursting premotor neurons and from a set of premotor neurons that  
133 do not burst during calling (“silent” with respect to calls) but are hyperpolarized prior  
134 to call onsets (Figure 1B). The activity profile of HVC premotor neurons was modulated  
135 by local inhibitory interneurons within HVC (Kosche et al., 2015; Markowitz et al.,  
136 2015). During calling, a subset of these interneurons transiently increased its firing  
137 rate prior to call-related premotor bursts, also coinciding with the onset of  
138 hyperpolarization in the silent premotor neurons (Figure 1A). The model reproduced  
139 this firing rate increase and timing relative to call production (Figure 1B).

140 In detail, the model consisted of an upstream population of 150 excitatory neurons  
141 (Mackevicius et al., 2020; Otchy et al., 2015; Danish et al., 2017), that projected onto  
142 both the premotor neuron and a population of 30 local inhibitory interneurons  
143 (Coleman & Mooney, 2004) (Figure 1B & C). Similar results were obtained with lower  
144 and higher numbers of neurons in those populations, as long as their ratio was around  
145 5:1 (Figure S1). This predicted vocal-related population (“V”) was driven by a transient,  
146 ramping input current (Figure S2A). The resulting activity led to a transient increase in  
147 interneuron spiking (Figure 1D). The main features of the modelled interneuron activity  
148 captured the observed range of activity: simulated population activity peaked at 167  
149 Hz (observed: 64.2 – 210.6 Hz), -17.5 ms relative to call onset (observed: -32.5 – 7.5  
150 ms) and returned to baseline at 8.1 ms (observed: -15.0 – 52.4 ms). The vocal  
151 production-related input to the bursting premotor neuron also replicated the gradual  
152 increase in subthreshold membrane potential prior to the burst, which was observed  
153 in the intracellular recordings (Figure 1E). The silent premotor neuron was  
154 hyperpolarized through inhibitory input from the interneurons (observed mean  
155 hyperpolarization onset =  $-52 \pm 14$  ms). Additionally, it received excitatory input from  
156 the vocal-related population, whereby synaptic weights were lower compared to the  
157 bursting premotor neuron (Table 2). The longer duration of the hyperpolarization  
158 observed in the recorded neurons, compared to the model neuron, might be a result

159 of receiving inhibition from multiple interneurons that reached peak activity at different  
 160 time points (see Figure 1D).  
 161

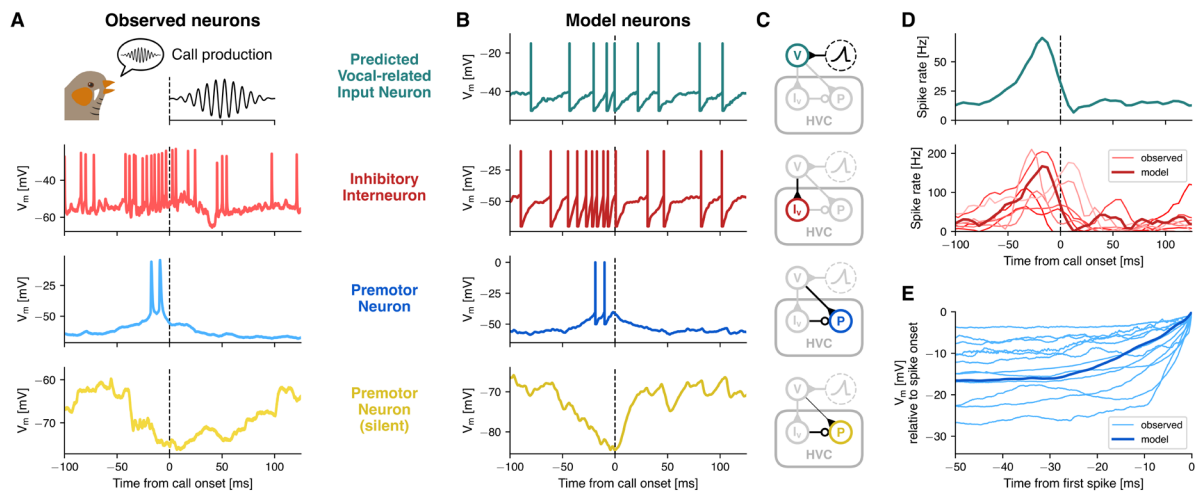

162  
 163 **Figure 1 – In silico call production-associated neural activity mirrors in vivo data.** (A) Example membrane  
 164 potential traces from intracellular recordings of an HVC inhibitory interneuron (red), a bursting HVC premotor  
 165 neuron (blue) and a silent HVC premotor neuron (yellow) aligned to the onset of a call (dashed line) produced by  
 166 the observed bird (data from Benichov & Vallentin, 2020). (B) Corresponding model traces of an interneuron (red),  
 167 a bursting premotor neuron (blue) and a silent premotor neuron (yellow), as well as a neuron from a predicted  
 168 population of upstream vocal-related input neurons (teal, top). (C) Circuit diagrams that show model connectivity  
 169 and highlight the respective populations and their incoming connections. Neuron populations are represented as  
 170 circles and synaptic connections between populations as lines ending either in excitatory synapses (triangles) or  
 171 inhibitory synapses (circles). The predicted vocal-related population receives only a quadratically ramping input  
 172 current that peaks and then returns to baseline prior to call onset (dashed circle). The silent premotor neuron  
 173 receives the same input as the bursting premotor neuron, however excitatory weights from the vocal-related  
 174 population are lower (8pA instead of 20pA). (D) Top: Spike rate of the predicted vocal-related population,  
 175 aligned to call onset (dashed line). Bottom: Spike rate of seven intracellularly recorded interneurons that ramp up in activity  
 176 prior to call onset, averaged across trials (light, thin lines), and average spike rate of the model interneuron  
 177 population (dark, thick line). (E) Ramping subthreshold membrane potential of twelve intracellularly recorded HVC  
 178 premotor neurons that burst around call onset (thin light blue lines) and the model premotor neuron (thick dark blue  
 179 line). All traces were aligned to the time point and membrane potential of their first spike onset (set to zero).  
 180 Recorded traces were averaged across trials and the model trace was averaged across 100 simulations, each with  
 181 different randomized amplitude offsets in the input current onto the predicted vocal-related neurons.

## 182 ***Feed-forward inhibition of premotor activity as a mediator of response timing***

183 The described network model is biologically plausible, consisted of only a small  
184 number of components, and replicated observed call-related premotor and interneuron  
185 activity in the zebra finch HVC. The model is versatile and, considering what is known  
186 about the network components, there are several ways in which it can be  
187 interconnected. Here, we proposed three different model schemes and tested their  
188 relative ability to replicate previously observed changes in call production-related HVC  
189 activity and experimentally induced perturbations of the circuit.

190 In the first model, we assumed that inhibition does not play a functional role within  
191 HVC during call interactions ('No Inhibition' model, Figure 2A). Because the bursting  
192 premotor population in this network configuration was independent of any call-related  
193 inhibitory input from interneurons, it followed that its activity is unaffected by changes  
194 in the weights of inhibitory synapses (Figure 2B). Experimentally, however, we found  
195 that local disinhibition of premotor neurons through focal application of the GABA<sub>A</sub>  
196 receptor antagonist, gabazine, resulted in stronger and earlier bursts relative to call  
197 onset (Benichov & Vallentin, 2020; Figure 2G). This discrepancy, together with  
198 evidence of the high connection probability between interneurons and premotor  
199 neurons in HVC (Mooney & Prather, 2005; Kosche et al., 2015; Kornfeld et al., 2017),  
200 suggested that the 'No Inhibition'- model was insufficient as an explanation of call-  
201 related neural activity in HVC.

202 Next, we tested two models that incorporate inhibition, with a unidirectional local  
203 connectivity between interneuron and premotor neuron. As our focus was on the  
204 activity that resulted in a premotor burst, as well as the timing of these bursts, possible  
205 effects of premotor bursts through recurrent connectivity with interneurons were  
206 excluded. A direct inhibitory input to the bursting premotor neurons was added either  
207 in a tonic or phasic mode (the latter triggered by external inputs). Both temporal  
208 patterns of inhibition are biologically plausible and have been reported to maintain the  
209 excitatory/inhibitory balance of a network (Kosche et al., 2015; Vogels et al., 2011). In  
210 HVC, multiple types of interneurons have been characterized (Wild et al., 2005;  
211 Colquitt et al, 2021), exhibiting tonic firing patterns in vitro (Daou et al., 2013) and  
212 structured phasic activity during song production (Kosche et al., 2015).

213 The 'Tonic Inhibition'-model included a population of consistently active interneurons  
214 synapsing onto the bursting premotor neuron (Figure 2C). In the 'Feed-Forward  
215 Phasic Inhibition'-model, interneurons driven by the predicted vocal-related input  
216 neurons transiently affected bursting premotor activity (Figure 2E).

217 Both models simulated the activity patterns of premotor neurons and interneurons  
218 during call production. By simulating gabazine conditions through progressive  
219 reduction of the inhibitory weights on the premotor neuron synapses in 5pA steps, we  
220 asked how varying inhibitory weights influenced premotor burst onsets, strength, and  
221 subthreshold membrane potentials for each wiring scheme. In both models, premotor  
222 bursts occurred earlier and contained more action potentials, similar to the results  
223 obtained experimentally (Figure 2C–F; cf. Figure 2G).

224 The main difference between the Tonic Inhibition and Feed-Forward Phasic Inhibition  
225 models were apparent in the effects of inhibition on the membrane potential of  
226 premotor neurons preceding call-related firing. In the Tonic Inhibition model, inhibition  
227 acted equally across the entire peri-call interval. Therefore, reducing the weights

228 effectively shifted the baseline membrane potential uniformly towards spike threshold.  
229 As a result, the ramping potential reached spiking threshold at successively earlier  
230 time points as the inhibitory synaptic weights are decreased (Figure 2D). On the other  
231 hand, in the Feed-Forward Phasic Inhibition model, the transient increase in  
232 interneuron firing counterbalanced the excitatory vocal-related drive during the pre-  
233 burst ramping more sparsely in time. In this case, when reducing inhibitory synaptic  
234 weights, we observed a more modest shift in the baseline potential as well as an  
235 increase in the steepness of the ramping subthreshold potential, resulting in an earlier  
236 threshold crossing and thus earlier and stronger premotor bursts (Figure 2F). The  
237 Tonic inhibition model, unlike the Feed-Forward Phasic Inhibition model, thus predicted  
238 a considerable increase in baseline membrane potential prior to premotor bursts  
239 caused by the reduction of inhibition, which was not observed during the experimental  
240 perturbation with Gabazine (Figure 2H & S3).

241 Taken together, these simulations demonstrate that a feed-forward connectivity  
242 between interneurons and premotor neurons was an effective way to capture the call-  
243 related activity data observed in experiments. To assess the model's sensitivity to  
244 variations in parameter values, we ran simulations with a range of synaptic weights  
245 and population sizes for the excitatory and inhibitory inputs onto the premotor neuron.  
246 We tested the resulting premotor traces for consistency with two features observed in  
247 the electrophysiological recordings: a baseline membrane potential between 5 and 25  
248 mV below spike threshold (Figure 1E) and the emission of 1 to 6 action potentials in  
249 the 50 ms preceding call production (Benichov & Vallentin, 2020). Those criteria were  
250 fulfilled in a relatively broad range of synaptic weight combinations (Figure S4) and  
251 population sizes (Figure S1). Reduction of excitatory weights in this Feed-Forward  
252 Phasic Inhibition model could cancel and ultimately reverse the effect of the ramping  
253 input, leading to a hyperpolarization of the premotor neuron (Figure 1B & S4).  
254 Reducing the inhibitory weights, on the other hand, resulted in both stronger and  
255 earlier premotor bursts, suggesting a role of HVC interneurons in call timing control  
256 which could be confirmed in future experiments.

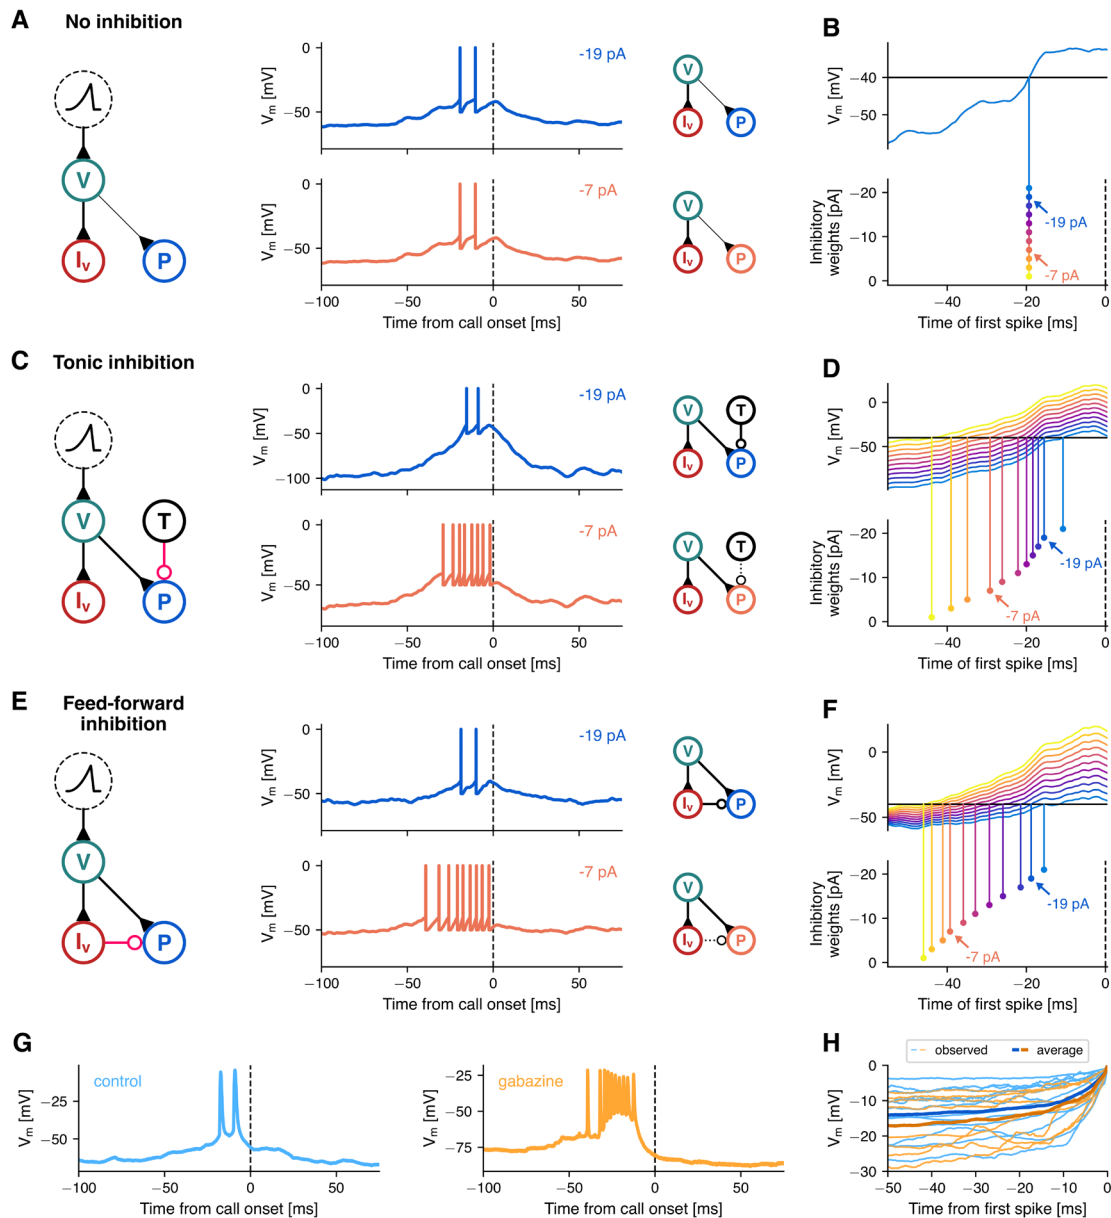

257

258 **Figure 2 – Feed-forward inhibition as a mediator for flexible response timing.** Three alternative models  
 259 consistent with the intracellular recordings in HVC (Figure 1), differing in connectivity (A, C, E). (A) In the ‘No  
 260 Inhibition’- model, local interneurons ( $I_v$ , red) driven by vocal-related input neurons ( $V$ , teal) silence a  
 261 subpopulation of premotor neurons (not shown, see Figure 1B&C, bottom). Premotor neurons bursting prior to call  
 262 onset ( $P$ , blue) are triggered by input from the same vocal-related input population as interneurons. The traces  
 263 show the membrane potential of the bursting premotor neuron when inhibitory weights were  $-21$  pA (blue, top) and  
 264  $-7$  pA (orange, bottom). (B) Membrane potential traces under a range of inhibitory weights, in the absence of a  
 265 spiking mechanism. As bursting premotor neurons in this model do not receive inhibition, globally modifying  
 266 inhibitory weights does not influence burst onset timing (i.e. spike threshold crossing). Arrows highlight the  
 267 respective traces in (A). (C-D) In the ‘Tonic Inhibition’- model the bursting premotor neurons additionally receive  
 268 inhibition from a population of tonically active interneurons ( $T$ , black). Reducing inhibitory weights in this model  
 269 pushes the membrane potential towards spike threshold, uniformly across time (i.e., both ramp and baseline  
 270 potential). This leads to earlier premotor bursts, as well as a larger number of spikes per burst (bottom trace,  $-7$   
 271 pA). (E-F) In the ‘Feed-Forward Inhibition’- model bursting premotor neurons receive feed-forward inhibition instead  
 272 of tonic inhibition, partially balancing the excitatory ramping input. This allows inhibition to influence the steepness  
 273 of the ramp and, to a lesser degree, impact the baseline membrane potential. As in (C-D), reduction of inhibitory  
 274 weights leads to earlier and stronger premotor bursts. (G) Two example traces recorded from premotor neurons,  
 275 one under control conditions (blue, same trace as in Figure 1) and one after microinfusions of GABA<sub>A</sub> antagonist  
 276 Gabazine in HVC (orange). Data from Benichov & Vallentin (2020). (H) Ramping subthreshold membrane potential  
 277 of the observed HVC premotor neurons that burst around call onset in the control condition (light blue,  $n=12$ ) and  
 278 in after Gabazine microinfusions (light orange,  $n=8$ ), as well as their respective averages (thick lines).



279 ***Heterogeneity in HVC and its inputs' activity profiles suggests an additional***  
280 ***source of call-related fast inhibition***

281 The Feed-Forward Phasic Inhibition model recapitulated the neural activity in HVC  
282 that generates motor output, i.e. precise premotor burst associated with call  
283 production. To enable alternating vocal turn taking, the bird does not only have to  
284 produce a call but also listen to its vocal partner. Therefore, we explored the neural  
285 dynamics during auditory perception and tested the robustness of the Feed-Forward  
286 Phasic Inhibition model in capturing sensory-related neuronal responses. To this end,  
287 we first looked for auditory-evoked activity in HVC by performing extracellular  
288 recordings in four awake, head-fixed (and as a consequence, vocally unresponsive)  
289 zebra finches (n = 225 neurons) while presenting a set of call playbacks. Under these  
290 conditions, responses observed in HVC are less likely to be confounded by activity  
291 that is directly related to vocal production.

292 Sparse bursting activity of premotor HVC<sub>(RA)</sub> projection neurons in adult zebra finches  
293 only occurs during song or call production (Hahnloser et al., 2002). In addition, HVC  
294 projection neurons have been shown to be unresponsive to song playback in awake  
295 adult zebra finches (Vallentin & Long, 2015) whereas interneurons increase their  
296 activity in response to the tutor song presentation (Vallentin et al., 2016). We therefore  
297 hypothesized that our neural recordings in response to call playbacks were  
298 oversampling the activity of HVC interneurons. To test this, we classified neurons as  
299 putative interneurons or projection neurons based on spike waveform features (Figure  
300 3A). This analysis showed an overrepresentation of neurons (171/225 units) with fast  
301 (trough to peak =  $0.1955 \pm 0.0422$  ms) and narrow waveforms (FMHW =  $0.4005 \pm$   
302  $0.0749$  ms), characteristic of interneuron populations (McCormick et al., 1985) (Fig 3  
303 A; marked in black after k-means clustering).

304 For further analysis, we took only neurons into account which were recorded during  
305 the presentation of at least 20 playbacks (179/225 units; Figure 3C). We classified  
306 neurons to be call-responsive when their average activity  $\pm$  SEM after call playback  
307 onset crossed a threshold of two standard deviations above/below baseline firing rate  
308 (79/179 units; Figure 3B & D). We were able to distinguish three general neural  
309 response patterns among the call-responsive neurons: increases in firing activity after  
310 call-playback onset, suppression of firing in response to the playback stimulus  
311 complex mixed responses with excitatory and inhibitory phases (Figure 3B). We  
312 explored this response heterogeneity in call-responsive cells in further detail by  
313 calculating the response onset ( $126.94 \pm 123.38$  ms) and response duration ( $104.69$   
314  $\pm 98.02$  ms). We found that cells can exhibit increased activity during call-playbacks  
315 with relatively fast response times or delayed increased activity after the offset of  
316 playbacks (Figure 3B). Suppressive responses occurred rapidly after playback onsets  
317 or with delayed onsets after playback offsets. This suggests that calls of a vocal  
318 partner can provide fast or delayed excitatory inputs onto HVC which can drive  
319 increases as well as decreases in HVC interneuron activity. When sorting the neurons  
320 that showed an excitatory response by the timing of their maximal firing rate exhibited  
321 during and after call playback we observed a strong overrepresentation of excitatory  
322 responses during playback and an underrepresentation in the 200 ms following  
323 playback offset (Figure 3D, left; 3E bottom). In contrast, when sorting the neurons that  
324 showed an inhibitory response by the timing of the peak of their minimum firing rate,  
325 we saw an overrepresentation of inhibitory responses from playback onset until 100  
326 ms after playback offset (Figure 3D, right; 3E bottom).

327 Since HVC is primarily a premotor nucleus generating the timing of vocal output, we  
 328 wondered whether the call playback-evoked excitatory response might have the  
 329 potential to directly trigger vocal production. To better understand the auditory signals  
 330 that contribute to call-related activity in HVC, we investigated its main source of higher  
 331 auditory input - the Nucleus Interfacialis (Nif) (Lewandowski et al., 2013). We  
 332 presented call playbacks to the awake bird while performing intracellular recordings of  
 333 Nif neurons ( $n = 6$  identified HVC projection neurons, 1 non-identified). These Nif<sub>(HVC)</sub>  
 334 neurons displayed call-related activity represented by either a suppression ( $-2.6 \pm 3$   
 335 Hz delta from baseline (silent period 300 ms prior to playback) or increase in firing rate  
 336 ( $5.6 \pm 6.6$  Hz delta from baseline) in response to call playbacks (Figure 4A). Call-  
 337 related activity was fast (onset time 35 ms) and the HVC neurons are a plausible  
 338 recipient of this information (Coleman & Mooney, 2004). In line with similar response  
 339 patterns to long distance call playbacks previously observed in unidentified Nif cells  
 340 (Lewandowski, 2011) we hypothesized that Nif activity contributes to call-related  
 341 activity changes observed in HVC.

342 Given that birds responded vocally with an average delay of  $\sim 200$  ms to call playbacks,  
 343 the function of the fast call-induced input from Nif we observed cannot fully explain the  
 344 direct triggering of call responses. Instead, this activity has the potential to drive  
 345 inhibitory interneurons in HVC which do not directly play a role in eliciting vocal output.  
 346 Inhibitory interneurons in HVC synapse locally onto premotor neurons and this  
 347 additional fast source of local inhibition in HVC could serve to suppress premotor  
 348 activity of an imminent call. This mechanism could thereby reduce the likelihood of call  
 349 overlap.

350

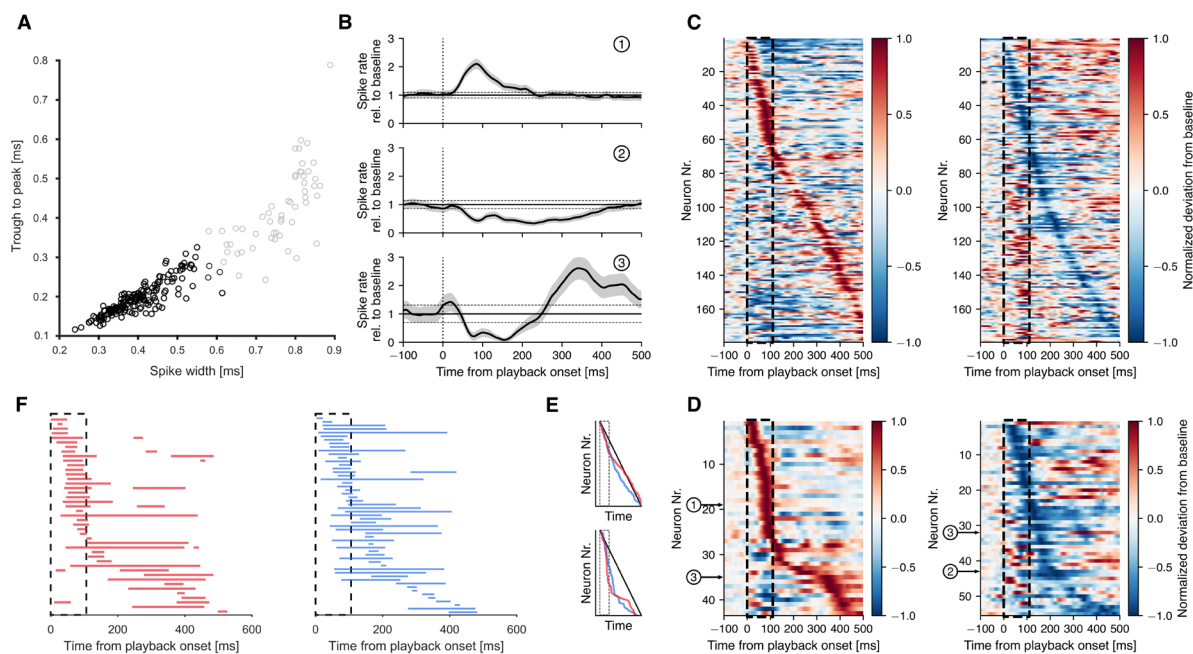

351  
352

353 **Figure 3 – Responses in HVC to call playback stimuli.** (A) Distribution of spike waveforms in feature space.  
 354 Black dots are putative interneurons, determined by k-means clustering. (B) Average spike rate of three HVC  
 355 neurons in response to call playbacks, normalized to baseline activity. Example of excitatory (top), inhibitory  
 356 (middle) and mixed response (bottom). Gray patches mark average  $\pm$  SEM. Horizontal lines mark baseline activity  
 357  $\pm 2$  standard deviations. Significant responses were defined as periods in which average rate - SEM exceeds  
 358 baseline activity + 2 standard deviations and vice versa. (C) Average spike rates from all cells recorded for a  
 359 minimum of 20 trials, normalized to baseline (0) and absolute maximum deviation from baseline (1 or -1), aligned

360 to call playback onset and sorted by time of maximum positive (left) or negative deviation (right) after playback  
361 onset. Dashed black lines mark time of call playback. **(D)** Subsets of neurons that show significant excitatory (left)  
362 and/or inhibitory responses (right) after playback onset, sorted by peak of positive or negative deviation,  
363 respectively. **(E)** Time of the sorted positive (red) and negative peaks (blue) as seen in (C) (top) and (D) (bottom),  
364 compared to the values expected if peaks were distributed uniformly in time (black diagonal line). **(F)** Onsets and  
365 offsets of significant excitatory (left) and inhibitory (right) responses per neuron, sorted as in (D).

366

367

368 ***Inhibitory suppression of premotor activity can reduce call overlap***

369 Next, we investigated the interaction between call-related premotor drive and auditory-  
370 evoked inhibition. To do so, we extended the Feed-Forward Phasic Inhibition model  
371 (Figure 1 & 2E) with a second set of upstream excitatory ('auditory') and local  
372 interneuron populations. These were connected through the same circuit motif of  
373 excitation and feed-forward inhibition (Figure 4B). Based on the synaptic delay of  
374 auditory input (Margoliash, 1983) and the observed activity profile within Nlf (Figure  
375 4), the auditory population received a shorter ramping input current that peaks at 35  
376 ms after playback onset with a short quadratic upstroke and linear downstroke (Figure  
377 S2B). In the interneuron population, this led to a transient peak in activity that matched  
378 the observed activity of a subset of the putative interneurons (Figure 4C). In contrast  
379 to the original model (Figure 2E), the balance of synaptic weights in the auditory model  
380 is biased towards inhibition, so that the premotor neuron in the absence of ramping  
381 input from the original vocal-related population was transiently hyperpolarized after  
382 call playback. We observed a similarly timed, albeit weaker hyperpolarization when  
383 we aligned intracellular recordings of premotor neurons to playback onset (Figure 4D).  
384 Other premotor neurons were slightly depolarized in the same timeframe (Figure S5).

385 To simulate call production at different time points relative to the playback, we varied  
386 the time difference between the input currents to the vocal-related and the auditory  
387 population while observing the delay or the suppression of bursts caused by auditory-  
388 evoked inhibition. Between 25 and 55 ms after playback onset, bursts were  
389 suppressed, as playback-evoked inhibition prevented the neuron from reaching spike  
390 threshold (Figure 4F & G). Bursts which occurred earlier were unaffected, while later  
391 bursts were delayed by up to 5 ms, due to a perturbation of the pre-burst ramp in  
392 subthreshold potential.

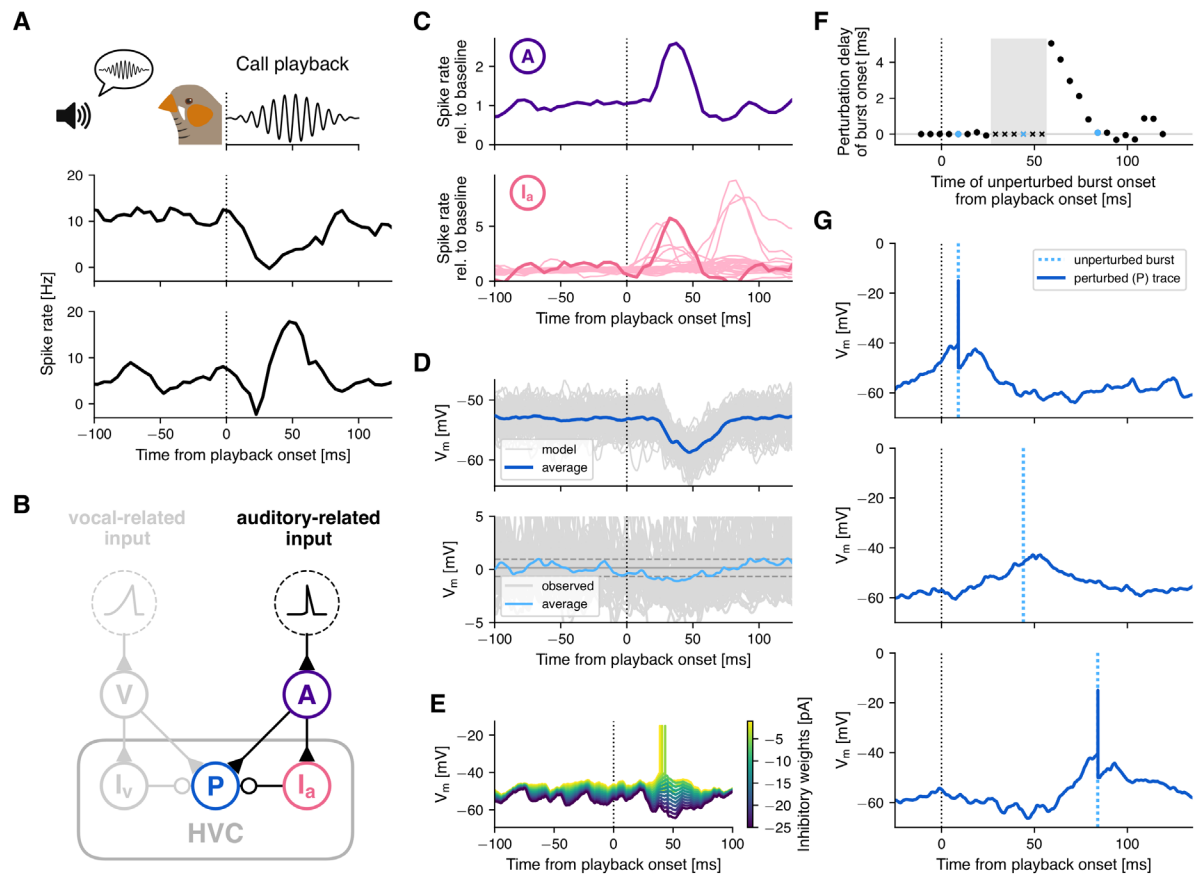

393

394 **Figure 4 – Playback-evoked inhibition can suppress premotor bursts associated with an imminent call. (A)**  
 395 **(B)** Circuit diagram of the feed-forward inhibition model, expanded with an auditory-related input population ('A',  
 396 purple) and a second inhibitory population ('I<sub>a</sub>', pink) providing excitatory and feed-forward inhibitory input to the  
 397 premotor neuron ('P', blue), respectively. **(C)** Population activity of the model auditory-related input population (top),  
 398 which receives a short, ramping input current (see Figure S2) after call playback onset (dotted line). This triggers  
 399 a peak of activity in the interneuron population (bottom), that is consistent with putative interneurons recorded  
 400 extracellularly in HVC (neurons that significantly increased their activity within 100 ms after playback onset; light pink).  
 401 **(D)** The bursting premotor neuron ('P', blue in (B)) at rest (i.e. while not receiving vocal-related input from V  
 402 & I<sub>v</sub>) is transiently hyperpolarized. Model traces from 100 simulations with different randomized input currents (gray)  
 403 and the average (blue). Below: Intracellular recordings of an example premotor neuron aligned to playback onset  
 404 (dotted line), which is significantly hyperpolarized following playback onset. Horizontal lines show mean baseline  
 405 potential ± 2 standard deviations (baseline: -100–0 ms). **(E)** Reduction of inhibitory weights onto the model  
 406 premotor neuron reverses its playback-induced hyperpolarization (see D), ultimately eliciting a spike. **(F)** Simulation  
 407 of the interaction between pre-call premotor activity (ramp and burst) and playback-evoked inhibitory suppression  
 408 at different relative time points. Premotor bursts can be suppressed (marked by crosses) or delayed (y-axis) by  
 409 playback-induced inhibition when the premotor burst occurs at different time points (x-axis) relative to the playback  
 410 onset (dotted line). The gray rectangle marks a time window during which premotor bursts are suppressed. **(G)**  
 411 Three example traces from the premotor neuron, bursting at different times relative to call playback. Top: Burst  
 412 occurs before peak in inhibition and is therefore not perturbed relative to the burst onset without inhibitory  
 413 suppression (blue dotted line). Middle: Burst is suppressed as pre-burst ramp occurs during inhibitory suppression,  
 414 hindering the membrane potential to reach spike threshold. Bottom: Ramp is modified by inhibition, but potential  
 415 still reaches threshold after a minimal delay.

416

417

418 After we determined the time window following playback onset, during which premotor  
 419 bursts were suppressed ('suppression window': 25 – 55 ms), we next estimated a time  
 420 window prior to the onset of call production, during which the suppression of premotor  
 421 bursts can potentially cancel the imminent call ('estimated window of susceptibility').  
 422 Average burst onset time of the observed premotor cells varied between -45.0 and

423 +33.4 ms relative to onset of call production (Figure 5B). We set the start of the  
424 estimated window of susceptibility to 60.95 ms before call onset (mean - standard  
425 deviation of the earliest average burst onset, Figure 5B). The end of the window was  
426 defined as 10 ms prior to call onset, as we assumed that after this time point any  
427 further changes at the level of HVC cannot influence call production, while the call was  
428 initiated further downstream.

429 Relating the suppression window with the estimated window of susceptibility allowed  
430 us to predict the behavioural outcome of the proposed suppression mechanism, given  
431 two assumptions regarding the temporal distribution and function of the pre-call  
432 premotor drive. First, we assumed that bursts were distributed nearly uniformly across  
433 time before call onset. Such a distribution has long been hypothesized for premotor  
434 neurons during song production (e.g., Hahnloser et al., 2002; Fee et al., 2004; Long  
435 et al., 2010) and more recently received support from electrophysiological recording  
436 and imaging of large populations of HVC projection neurons (Lynch et al., 2016;  
437 Picardo et al., 2016). Despite a smaller dataset, intracellular recordings during call  
438 production suggested a similar distribution for pre-call activity (Figure 5B).

439 Second, we assumed that the triggering of a timed call response depends on the  
440 number of premotor spikes. Call-like vocalizations can be elicited by electrical  
441 stimulation of down-stream nucleus DM, however only above a certain stimulation  
442 threshold (Vicario & Simpson, 1995, Ashmore et al., 2008; Fukushima & Aoki, 2000).  
443 It is likely that excitatory input to DM from HVC (via RA) is sufficiently strong to elicit a  
444 call response. Suppression of a significant number of premotor bursts through  
445 auditory-evoked inhibition would thus reduce the likelihood of a call response. For our  
446 model we decided to assume a linear relationship between the magnitude of premotor  
447 activity and the probability of call initiation.

448 Given these two assumptions, the amount of overlap between the suppression window  
449 and the estimated window of susceptibility predicted the likelihood of a call being  
450 triggered. We determined the overlap as a function of call onset timing relative to  
451 playback onset ('suppression function', Figure 5D). If a bird were to call at random  
452 times in the absence of playback, we would expect playback-evoked inhibition to result  
453 in a dip in the call onset distribution shortly after the onset of playback. We first  
454 generated uniformly distributed random call onset times (Figure 5E, grey). To simulate  
455 playback-evoked call suppression, we then removed each call with a probability  
456 proportional to the suppression function (Figure 5E, blue, see Methods).

457 Through this process we effectively simulated the behavioral output (i.e., call response  
458 time distribution) predicted by the modeling of fast and transient auditory-evoked  
459 inhibitory suppression of premotor activity. According to the prediction, call likelihood  
460 decreases between 50 and 110 ms post playback. Inhibitory suppression in the model  
461 had the potential to suppress call production shortly after an incoming auditory cue,  
462 and could thereby partially reduce the overlap of calls between two vocally interacting  
463 birds. Complete overlap of calls (i.e., two birds initiating a call within 50 ms of each  
464 other) was not affected, as in this case the initiation of each call would occur before  
465 auditory information about the partner's call affects activity in HVC.

466 For a comparison to observed behavioral data (Benichov & Vallentin, 2020), we pooled  
467 the call onset times of all birds responding to a regularly timed call playback (one call  
468 per second) in either a control condition or after gabazine application (Figure 5C). The  
469 onset of call suppression in the predicted call onset distribution matches that of the

470 control condition (Figure 5E). At around 150 ms after playback onset, the observed  
471 call responses sharply increased above the pre-suppression baseline. At this point the  
472 predicted distribution deviated from the recorded distribution, as increased call  
473 likelihood in response to the playback was not factored into the model. In the gabazine  
474 condition, no reduction of call responses following playback could be observed (Figure  
475 5C & E). This outcome was expected, as a reduction of inhibitory efficacy in HVC  
476 reduces or even eliminates the effect of the proposed suppression mechanism.  
477 Instead, response likelihood increased above baseline between 80 and 90 ms after  
478 playback onset, i.e. already before playback offset.

479 Taken together, these results indicated that inhibition within HVC regulated the  
480 behavioral output on two time scales: On a short time scale, an auditory-evoked  
481 increase in inhibition led to a suppression of vocal motor output while the social partner  
482 was producing a vocalization and, thus, a call was being withheld and vocal overlap  
483 prevented. On a longer time scale, inhibition was related to the premotor preparation  
484 and controlling the precise timing of a vocalization.

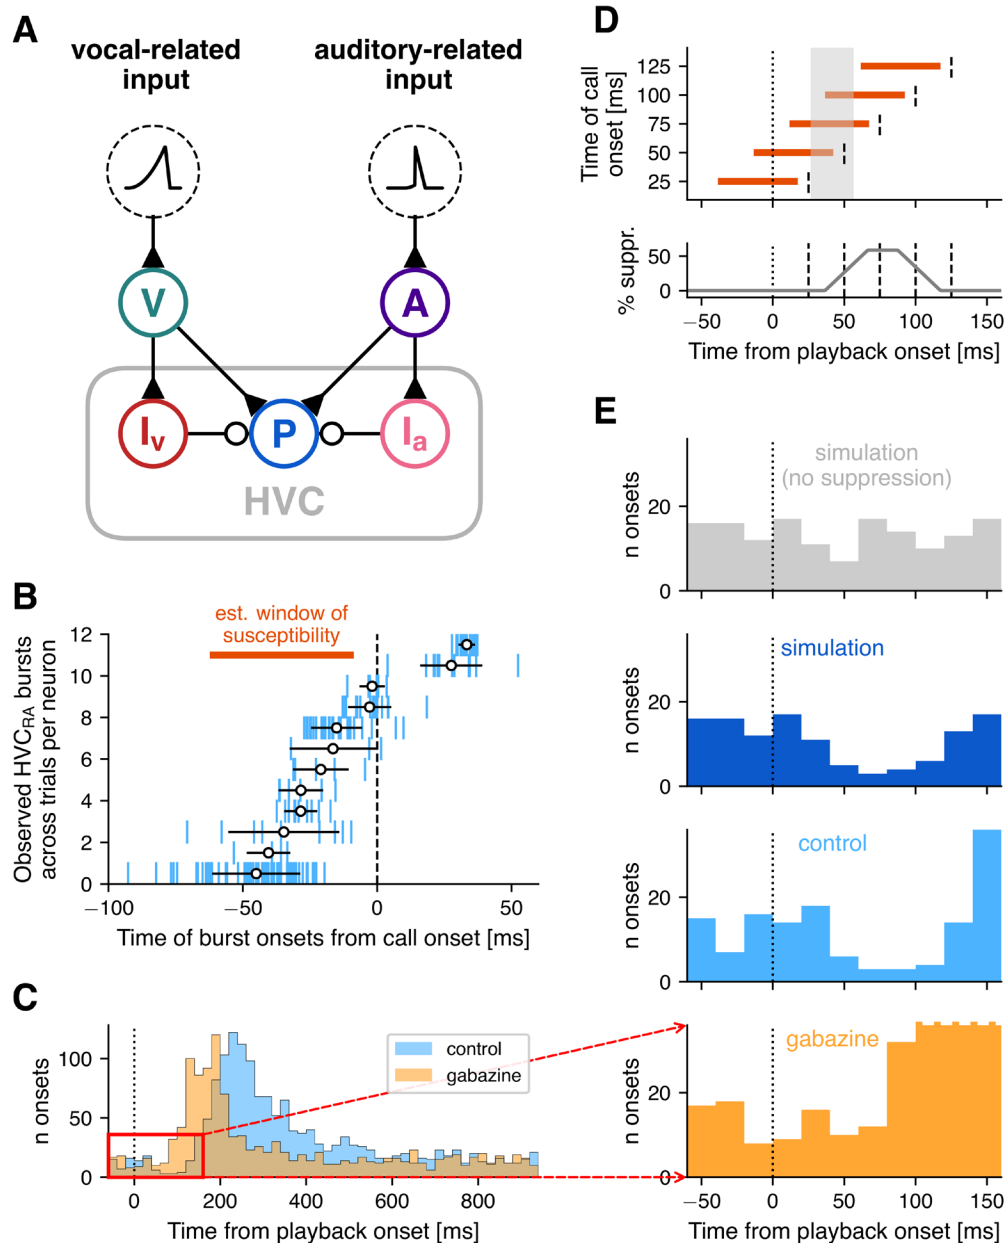

485

486

487

488

489

490

491

492

493

494

495

496

497

498

499

500

501

502

503

504

**Figure 5 – Playback-evoked inhibitory suppression of premotor activity can reduce call overlap.** (A) Circuit diagram of the full model. (B) Timing of all burst onsets during multiple trials relative to onset of call production (x-axis) for all 12 observed HVC premotor neurons in the control condition (y-axis). The orange bar marks the estimated time window during which premotor neurons triggering call production are susceptible to inhibitory suppression. (C) Full histograms of call onsets during control (blue) and Gabazine conditions (orange) across the one second inter-playback interval. The red rectangle highlights the section depicted in (E). (D) Five example call-onsets (dashed lines) with their associated windows of susceptibility (orange bars). Below is a function of the percentage of overlap of the window of susceptibility with the suppression window (gray rectangle, see Figure 4F), i.e. the percentage of premotor suppression (y-axis) against the onset time of a hypothetically produced call. Example call onsets from above are marked by dashed lines. (E) We simulated a random uniform distribution of call onsets (gray) and removed calls with a likelihood proportional to the suppression function in (D). The resulting call onset distribution (blue) matches that of the behavioral experiments in the control condition (light blue), both of which show a dip in call likelihood between around 50 and 110 ms after playback onset. Consistent with our model, Gabazine microinfusions in HVC abolished that dip (orange). Instead, response likelihood begins to sharply increase around 80 ms after playback onset. Histogram bars after 100 ms are cut off in the Gabazine panel. Data in (B, C & E) from Benichov & Vallentin (2020).



505 ***Inverting excitatory/inhibitory balance leads to auditory triggering of calls***  
506 ***instead of suppression***

507 The observed fast call responses cannot be explained by the vocal-related input alone.  
508 When reducing feed-forward inhibitory weights in the model, premotor bursts occur, at  
509 most, 50 ms earlier (Figure 2F). While this timescale could partially account for the  
510 reductions in call response latency observed in the gabazine experiments, it did not  
511 fully explain the observation of the largest time differences in the case of the fastest  
512 responses (the most extreme bird reduced its response latency by 200 ms after  
513 Gabazine application; Benichov & Vallentin, 2020).

514 Having validated this model for auditory-evoked suppression of call production, we  
515 thus wanted to test whether the fastest responses during gabazine treatment could be  
516 directly triggered by auditory-related input. Therefore, we gradually decreased the  
517 synaptic weights of the auditory-driven interneuron population onto the premotor  
518 neuron, mimicking the effects of gabazine application. As the inhibitory weights  
519 decreased, the excitatory drive of the auditory population increasingly dominated the  
520 synaptic input, leading to a transient depolarization in the premotor neuron (Figure  
521 4E). With reduced inhibitory weights ( $< 6$  mV), the auditory input elicited a spike.

## 522 DISCUSSION

523 We developed a network model of zebra finch HVC that illustrates how cortical control  
524 over innate vocalizations (calls) can facilitate vocal turn-taking. In the proposed model,  
525 HVC integrates auditory and premotor information and gates the production of call  
526 responses by sending excitatory input to downstream vocal-motor nuclei at  
527 appropriate times.

528 The model accounts for the observation that the restriction of inhibitory influence in  
529 HVC leads to birds responding significantly faster to the calls of a vocal partner  
530 (Benichov & Vallentin, 2020). This reduction in response latency can be brought about  
531 by the shift in balance of excitatory and inhibitory input onto model premotor neurons  
532 in two (non-exclusionary) conditions: fast and slow responding. First, the dominance  
533 of excitation during the integration of vocal-related input causes premotor neurons to  
534 reach spike threshold earlier, predicting a reduction in response latency on the order  
535 of 50 ms. Second, if the fast auditory-evoked neural response (< 50 ms) to call  
536 playback leads to a strong enough depolarization, it can lead to premotor spiking  
537 activity even before the arrival of production-related input. Whether this is the case in  
538 vivo, and whether this activity would suffice to trigger a call response remains to be  
539 investigated.

540 One prerequisite for the replication of our model of the in vivo recorded activity of HVC  
541 neurons during calling is an excitatory “vocal-related” input to HVC occurring at the  
542 onset of call production-related changes in activity. This raises the question: What is  
543 the source of excitation that would drive an increase in interneuron activity and causes  
544 premotor neurons to burst?

545 For calls that are produced in response to the heard calls of conspecifics, afferent  
546 auditory-related input onto HVC would be one likely source. It is known that premotor  
547 nucleus HVC receives excitatory input from multiple areas: the thalamic nucleus UVA  
548 sends both vocal- and auditory-related information to HVC (Hahnloser et al., 2008;  
549 Danish et al., 2017; Akutagawa & Konishi, 2005). Sensorimotor nucleus Nlf (Nucleus  
550 interfacialis) provides the largest source of auditory information onto HVC premotor  
551 neurons and interneurons (Coleman & Mooney, 2004; Rosen & Mooney, 2006;  
552 reviewed in Lewandowski et al., 2013), and there is evidence of direct auditory input  
553 from other regions of the auditory forebrain as well (Shaevitz & Theunissen, 2007).

554 Although there is some evidence for direct input from auditory forebrain areas Field L  
555 and the lateral caudal mesopallium (CM; Shaevitz & Theunissen, 2007), Nlf appears  
556 to be a likely candidate area for several reasons. Nlf projects directly onto HVC and  
557 provides its strongest source of auditory information (Lewandowski et al., 2013; Janata  
558 & Margoliash, 1999; Cardin & Schmidt, 2004). The time course of activity of the  
559 predicted vocal-related input population in relation to the onset of calls (Figure 1D)  
560 closely matches that of neurons previously recorded in Nlf during call production  
561 (Lewandowski, 2011). The timing of call-related Nlf activity relative to call-related  
562 activity in HVC is consistent with monosynaptic inputs.

563 While call-related increase in interneuron activity necessitates an excitatory drive,  
564 premotor bursts could hypothetically be a result of post-inhibitory rebound  
565 depolarization. However, this phenomenon appears to be absent in most premotor  
566 neurons in adult zebra finches (Daou et al., 2013; Ross et al., 2017, 2019), reducing  
567 the likelihood that premotor bursts were triggered solely by the offset of inhibition,  
568 without any excitatory input. Another excitatory neuron type in HVC that projects to

569 “Area X” of the basal ganglia does exhibit rebound spiking. These cells sparsely  
570 synapse onto premotor neurons (Mooney & Prather, 2005) and could thereby  
571 theoretically induce premotor bursts in a scenario in which external excitation only  
572 drives interneurons (Ross et al., 2017). interneurons, however, do not return to their  
573 baseline firing rate until after call onset  $20.9 \pm 19.9$  ms which is after the average burst  
574 onset of premotor cells ( $-14.4 \pm 23.8$  ms). Thus, the relative timing of premotor and  
575 interneuron activity and the sparse connectivity profile between HVC-X neurons and  
576 premotor neurons does not support rebound spiking induced excitation as a  
577 mechanism for premotor drive.

578 It is important to note that we modelled a single hypothetical bursting premotor neuron,  
579 which we assume to be representative for the entirety of premotor neurons. The  
580 recorded activity among the different premotor and interneurons was qualitatively  
581 similar: sparse bursts and a transient increase in firing rate, respectively (Benichov &  
582 Vallentin, 2020). Each individual neuron exhibited a relatively stereotyped time course  
583 across trials, with respect to call onset. Across neurons, however, the timing differed  
584 for both premotor and interneurons (Benichov & Vallentin, 2020; Figure 1D & 5B).  
585 Similar variability in the timing of vocal-related input neurons could account for these  
586 observations. Subsets of these neurons that ramp up in activity at different time points  
587 could thus drive different subsets of HVC premotor and interneurons that become  
588 active at different time points relative to call onset.

589 In conclusion, the model we propose allowed us to examine social coordination from  
590 the perspective of a relatively simple sensorimotor circuit and has highlighted several  
591 potentially important mechanisms. Specifically, vocalization-related premotor  
592 inhibitory strength can achieve temporal fine-tuning of vocal responses and auditory-  
593 evoked inhibition can temporally suppress premotor drive, thereby reducing  
594 simultaneous calling, e.g. ‘jamming’. The role of inhibition, in both of these regulatory  
595 processes, is more extensive than previously thought and suggests that further  
596 investigation of inhibitory cell types and connectivity are required within the songbird  
597 vocal-motor pathway and other sensorimotor circuits more broadly. The underlying  
598 feed-forward wiring scheme of excitatory and inhibitory neurons can be found across  
599 brain areas and species. Applying this model to the study of vocal turn-taking in other  
600 experimentally tractable model systems, including singing mice (Okobi et al., 2019)  
601 and marmosets (Takahashi et al., 2013, 2016; Dohmen & Hage, 2019), would  
602 determine if these mechanisms are general inhibitory principles of interactive vocal  
603 control. Our model therefore provides a versatile framework for testing predictions  
604 about vocal turn-taking behaviors observed across a variety of times scales and  
605 species.

606

## 607 **MATERIALS AND METHODS**

608 **Animals.** All animal care and experimental procedures were performed with the  
609 ethical approval of the Max Planck Institute for Ornithology and the Regierung von  
610 Oberbayern (ROB-55.2-2532.Vet\_02-18-182). For extracellular recordings, we used  
611 4 adult male zebra finches (> 90 days post hatching) that were acquired from the  
612 breeding facility at the Max Planck Institute for Ornithology. –Throughout the  
613 experiments, the birds were maintained in a temperature and humidity controlled  
614 environment with a 14/10 hour light/dark schedule and ad-libitum food and water.

615 **Surgery.** Zebra finches were anesthetized with isoflurane (1–3% in oxygen). The  
616 centers of RA and HVC were located based on stereotactic coordinates and two small  
617 craniotomies were performed at the targets. Intracellular microdrive implantation and  
618 pharmacological perturbations were previously described in Benichov & Vallentin  
619 2020. In all cases, a chlorided silver ground wire (0.001", California Fine Wires) was  
620 implanted above the cerebellum. For antidromic identification of HVC-RA projecting  
621 premotor neurons, a bipolar stimulating electrode was implanted into the downstream  
622 nucleus RA. A custom-made stainless steel head plate was affixed to the skull using  
623 dental acrylic (Paladur, Kulzer International). The craniotomies were protected until  
624 experiments were conducted using a silicone elastomer (Kwik-Cast; WPI). Animals  
625 were returned to their home cage with a companion bird for at least 24 hours post-  
626 surgery and were monitored to ensure full recovery before experiments commenced.

627 **Playbacks.** For measuring neural responses to calls, we presented call playbacks at  
628 65 dB through a speaker placed in front of the head-fixed birds. The presented stimuli  
629 were recordings of an average male “stack” call, presented using a custom-made  
630 labview interface in blocks of 10 at a rate of 1 call per second (Benichov et al., 2016),  
631 with 3 seconds of silence between each block. A 10 ms 15 kHz pulse (beyond zebra  
632 finch auditory range) was simultaneously played at the onset of each stimulus to  
633 ensure subsequent uniform alignment of playbacks with the neural data.

634 **Electrophysiological recordings.** Awake-behaving intracellular microdrive  
635 recordings were performed as previously described in detail (Benichov & Vallentin,  
636 2020). Extracellular recordings during call playback were performed in head-fixed  
637 awake birds held in a soft foam restraint. A 16-channel silicon probe (NeuroNexus)  
638 was lowered into HVC (between 300-700  $\mu\text{m}$  from the dorsal surface) using a  
639 micromanipulator (Sutter Instruments). Neural activity was digitized at a sampling rate  
640 of 30 kHz on an Intan RHD2132 headstage and acquired with an RHD Recording  
641 Controller (Intan Technologies). A TTL pulse was triggered by the 15 kHz tone at the  
642 onset of each playback presentation using an Arduino Uno, and delivered to the RHD  
643 Recording Controller for acquisition alongside the neural data.

644 **Data Analysis.** We used Plexon Offline Sorter for spike detection and clustering and  
645 MATLAB R2020a and Python 3.7 for data analysis. For the analysis of the extracellular  
646 recordings (Figure 3) only neurons were regarded that had a minimum of 20 trials (i.e.  
647 playbacks).

648 Spike rate time series in Figures 1D and 4A & C were calculated with a bin size of  
649 5 ms and smoothed using a Savitzky-Golay filter with window length 9 and polynomial  
650 of order 3 (. Spike rate time series in Figure 3 were calculated with a bin size of  
651 11.1 ms, linearly interpolated to a 1 ms resolution and then smoothed using a Savitzky-  
652 Golay filter with window length 99 and polynomial of order 2.

653 Significant responses of the extracellularly recorded HVC neurons (Figure 3) were  
654 determined as follows: Responses were defined as periods in which the average spike  
655 rate  $\pm$  SEM after call playback onset crossed a threshold of two standard deviations  
656 above/below baseline firing rate remained above/below this threshold for at least  
657 15 ms. If two positive or negative response onsets followed each other within a time  
658 interval of 200 ms, the two responses were merged and counted as one response  
659 starting at the onset of the first and ending at the offset of the second response. If the  
660 gap between two positive or negative responses was shorter than 120 ms, then this  
661 time interval was extended to 350 ms.

662 One of the eight intracellularly recorded interneurons was omitted from the analysis  
663 (Figure 1D and corresponding values), due to the low number of trials ( $n=3$ ). Its activity  
664 peaked at 59.2 Hz, 2.5 ms after call onset and returned to baseline at 71.6 ms.

665 **Neuron model.** To simulate the membrane potential dynamics of neurons in the zebra  
666 finch song system, we used a leaky integrate-and-fire neuron model with current-  
667 based synapses. The voltage dynamics of the membrane are described by the  
668 equation

$$669 \quad \tau_m \frac{dv}{dt} = E_L - v + R_m (I_e + I_s), \quad (1)$$

670 where  $v$  is the membrane potential,  $E_L$  the leak potential (or resting potential),  $R_m$  the  
671 membrane resistance, and  $\tau_m$  the membrane time constant. When the membrane  
672 potential of a neuron reaches its threshold  $v_{thresh}$ , it is instantaneously set to its reset  
673 potential  $v_{reset}$  and a spike is emitted.  $I_e$  and  $I_s$  are the electrode current and synaptic  
674 current, respectively.  $I_e$  is used to inject either a time-varying current into the predicted  
675 upstream populations (Figure S2) or a small constant current representing unspecific  
676 background excitation. Synaptic currents are determined by:

$$677 \quad \tau_1 \frac{dI_s}{dt} = \frac{\tau_2 \tau_1}{\tau_2 - \tau_1} * s - I_s, \quad (2)$$

$$678 \quad \tau_2 \frac{ds}{dt} = -s, \quad (3)$$

679 where  $\tau_1$  is the decay time constant ( $\tau_{decay}$ ) and  $\tau_2$  the rise time constant ( $\tau_{rise}$ ) of the  
680 bi-exponential synaptic current (Figure S6). Each time a presynaptic neuron spikes,  
681 the corresponding synaptic weight is added to  $s$  in the postsynaptic neuron.

682 Parameters for excitatory and inhibitory model neurons and synapses were fit to data  
683 from electrophysiological studies of zebra finch HVC<sub>(RA)</sub> premotor neurons and HVC  
684 interneurons, respectively (Mooney & Prather, 2005; Kosche et al., 2015; Hamaguchi  
685 et al., 2016), and are given in Table 1. As such studies are sparser for nuclei upstream  
686 of HVC, and as we don't know the exact source of the excitatory input we propose, we  
687 chose to use the same parameters that were fit to HVC premotor neurons for the  
688 predicted upstream populations ("excitatory" in Table 1).

689

690 **Table 1 - Neuron and synapse model parameters.** Parameters used for all excitatory (vocal- and auditory-related  
 691 input, premotor) and inhibitory neurons (interneurons).  $E_L$ : leakage or resting membrane potential,  $V_{reset}$ : reset  
 692 potential,  $V_{thresh}$ : spiking threshold potential,  $\tau_m$ : membrane time constant,  $R_m$ : membrane resistance,  $\tau_{decay}^e/\tau_{decay}^i$ :  
 693 decay time constants for excitatory and inhibitory synaptic currents, respectively,  $\tau_{rise}^e/\tau_{rise}^i$ : rise time constants for  
 694 excitatory and inhibitory synaptic currents, respectively,  $t_{ref}$ : absolute refractory period.

|                   | $E_L$<br>[mV] | $V_{reset}$<br>[mV] | $V_{thresh}$<br>[mV] | $\tau_m$<br>[ms] | $R_m$<br>[M $\Omega$ ] | $\tau_{decay}^e$<br>[ms] | $\tau_{rise}^e$<br>[ms] | $\tau_{decay}^i$<br>[ms] | $\tau_{rise}^i$<br>[ms] | $t_{ref}$<br>[ms] |
|-------------------|---------------|---------------------|----------------------|------------------|------------------------|--------------------------|-------------------------|--------------------------|-------------------------|-------------------|
| <b>Excitatory</b> | -75           | -50                 | -40                  | 16               | 200                    | 1.6                      | 0.4                     | 2.2                      | 0.4                     | 1                 |
| <b>Inhibitory</b> | -60           | -70                 | -45                  | 8                | 200                    | 0.6                      | 0.5                     | 0.6                      | 0.5                     | 1                 |

695

696

697 **Input currents.** Neurons in the predicted upstream populations (vocal- and auditory-  
 698 related input) are driven by a time-varying input current that is aligned to the onset of  
 699 call production or playback onset, respectively. For the vocal-related input neurons,  
 700 these currents are characterized by a constant baseline current, followed by a  
 701 quadratic upstroke from 80 to 10 ms prior to call onset and a linear return to baseline  
 702 from 10 to 0 ms prior to call onset (Figure S2A). Input to the auditory-related input  
 703 neurons ramps up between 10 and 35ms after playback onset and returns to baseline  
 704 between 35 and 60 ms (Figure S2B). For the vocal-related input neurons, baseline  
 705 current is 170 pA and input peaks at 220 pA (auditory-related: 168 pA and 180 pA,  
 706 respectively).

707 To induce variability between neurons in their spiking pattern, at each timestep a time-  
 708 varying offset is multiplied with the current value at that timestep and added to the  
 709 input current. This time-varying offset changes every millisecond, where a new  
 710 pseudorandom value is drawn from a normal distribution with mean 0 pA and variance  
 711 200 pA (Figure S2). Additionally, each current segment (baseline, upstroke,  
 712 downstroke, baseline) for each neuron is offset by a pseudorandom value drawn from  
 713 a normal distribution with mean 0 pA and variance 10 pA. The remaining neural  
 714 populations (inhibitory and premotor neurons) receive a constant input current of 30  
 715 pA that represents unspecific background excitation.

716 **Network connectivity.** Model neurons between the different populations are  
 717 connected randomly in an all-to-all manner, with connection probabilities given in  
 718 Table 2. There are no recurrent connections between neurons within populations.

719 **Simulation:** Model simulations were carried out in Python 3.7 using Brian 2 version  
 720 2.2.2.1 (Stimberg et al., 2019). Equations (1–3) were integrated analytically (using  
 721 Brian’s ‘exact’ method), with a constant time step of 0.02 ms.

722 Except for the premotor neuron, all model neurons were initialized with different  
 723 membrane potentials between  $E_L$  and  $v_{thresh}$ , drawn pseudorandomly from a uniform  
 724 distribution.

725 For visualization purposes, artificial spikes were added to the model voltage traces in  
 726 Figures 1, 2, 4 and 5 as vertical lines above spike threshold at the time points of each  
 727 spike.

728

729  
730  
731  
732  
733  
734  
735

**Table 2 - Network model parameters.** Parameters used for the different network models presented in Figures 1, 2 and 5. Capital letters denote the different neuron populations. V: Vocal-related input, I<sub>v</sub>, I<sub>a</sub>: Interneuron, P: Premotor, A: Auditory-related input, T: Tonicly active interneuron. The synaptic weight from the vocal-related input population to the silent premotor neuron (yellow in Figure 1B) was 8 pA instead of 20 pA. Parameters that are identical for all models are shaded in gray. Connection probabilities (Conn. prob.) and synaptic weights and delays between populations A, I<sub>a</sub> and P in the full model are the same as between V, I<sub>v</sub> and P, except where stated otherwise.

| Model                           | No Inhibition<br>(Figure 2A) | Tonic Inhibition<br>(Figure 2C) | FF-Inhibition<br>(Figure 1 & 2E) | Full model<br>(Figure 5A) |
|---------------------------------|------------------------------|---------------------------------|----------------------------------|---------------------------|
| Nr. of neurons V                | 150                          | 150                             | 150                              | 150                       |
| Nr. of neurons I <sub>v</sub>   | 30                           | 30                              | 30                               | 30                        |
| Nr. of neurons P                | 1                            | 1                               | 1                                | 1                         |
| Nr. of neurons A                | —                            | —                               | —                                | 150                       |
| Nr. of neurons I <sub>a</sub>   | —                            | —                               | —                                | 25                        |
| Nr. of neurons T                | —                            | 120                             | —                                | —                         |
| Conn. prob. M → I <sub>v</sub>  | 0.3                          | 0.3                             | 0.3                              | 0.3                       |
| Conn. prob. I <sub>v</sub> → P  | —                            | —                               | 1                                | 1                         |
| Conn. prob. V → P               | 0.4                          | 1                               | 1                                | 1                         |
| Conn. prob. T → P               | —                            | 1                               | —                                | —                         |
| Syn. weights V → I <sub>v</sub> | 40 pA                        | 40 pA                           | 40 pA                            | 40 pA                     |
| Syn. weights I <sub>v</sub> → P | —                            | —                               | -19 pA                           | -21 pA                    |
| Syn. weights V → P              | 20 pA                        | 20 pA                           | 20 pA                            | 20 pA                     |
| Syn. weights T → P              | —                            | -23 pA                          | —                                | —                         |
| Syn. weights A → P              | —                            | —                               | —                                | 6 pA                      |
| Syn. delay V → I <sub>v</sub>   | 0.5 ms                       | 0.5 ms                          | 0.5 ms                           | 0.5 ms                    |
| Syn. delay I <sub>v</sub> → P   | 0.4 ms                       | 0.4 ms                          | 0.4 ms                           | 0.4 ms                    |
| Syn. delay V → P                | 0.9 ms                       | 0.9 ms                          | 0.9 ms                           | 0.9 ms                    |
| Syn. delay T → P                | —                            | 0.4 ms                          | —                                | —                         |

736

## 737 References

- 738 Akutagawa, E., & Konishi, M. (2005). Connections of thalamic modulatory centers to the  
739 vocal control system of the zebra finch. *Proceedings of the National Academy of Sciences*,  
740 *102*(39), 14086–14091. <https://doi.org/10.1073/pnas.0506774102>
- 741 Ashmore, R. C., Renk, J. A., & Schmidt, M. F. (2008). Bottom-Up Activation of the Vocal  
742 Motor Forebrain by the Respiratory Brainstem. *Journal of Neuroscience*, *28*(10), 2613–2623.  
743 <https://doi.org/10.1523/JNEUROSCI.4547-07.2008>
- 744 Benichov, J. I., Benezra, S. E., Vallentin, D., Globerson, E., Long, M. A., & Tchernichovski,  
745 O. (2016). The Forebrain Song System Mediates Predictive Call Timing in Female and Male  
746 Zebra Finches. *Current Biology*, *26*(3), 309–318. <https://doi.org/10.1016/j.cub.2015.12.037>
- 747 Benichov, J. I., & Vallentin, D. (2020). Inhibition within a premotor circuit controls the timing  
748 of vocal turn-taking in zebra finches. *Nature Communications*, *11*(1), 221.  
749 <https://doi.org/10.1038/s41467-019-13938-0>
- 750 Brainard, M. S., & Doupe, A. J. (2002). What songbirds teach us about learning. *Nature*,  
751 *417*(6886), 351–358. <https://doi.org/10.1038/417351a>
- 752 Cannon, J., Kopell, N., Gardner, T., & Markowitz, J. (2015). Neural Sequence Generation  
753 Using Spatiotemporal Patterns of Inhibition. *PLOS Computational Biology*, *11*(11),  
754 e1004581. <https://doi.org/10.1371/journal.pcbi.1004581>
- 755 Cardin, J. A., & Schmidt, M. F. (2004). Auditory Responses in Multiple Sensorimotor Song  
756 System Nuclei Are Co-Modulated by Behavioral State. *Journal of Neurophysiology*, *91*(5),  
757 2148–2163. <https://doi.org/10.1152/jn.00918.2003>
- 758 Coleman, M. J., & Mooney, R. (2004). Synaptic transformations underlying highly selective  
759 auditory representations of learned birdsong. *The Journal of Neuroscience: The Official*  
760 *Journal of the Society for Neuroscience*, *24*(33), 7251–7265.  
761 <https://doi.org/10.1523/JNEUROSCI.0947-04.2004>
- 762 Colquitt, B. M., Merullo, D. P., Konopka, G., Roberts, T. F., & Brainard, M. S. (2021). Cellular  
763 transcriptomics reveals evolutionary identities of songbird vocal circuits. *Science*, *371*(6530).  
764 <https://doi.org/10.1126/science.abd9704>
- 765 Danish, H. H., Aronov, D., & Fee, M. S. (2017). Rhythmic syllable-related activity in a  
766 songbird motor thalamic nucleus necessary for learned vocalizations. *PLOS ONE*, *12*(6),  
767 e0169568. <https://doi.org/10.1371/journal.pone.0169568>
- 768 Daou, A., Ross, M. T., Johnson, F., Hyson, R. L., & Bertram, R. (2013). Electrophysiological  
769 characterization and computational models of HVC neurons in the zebra finch. *Journal of*  
770 *Neurophysiology*, *110*(5), 1227–1245. <https://doi.org/10.1152/jn.00162.2013>
- 771 Dohmen, D., & Hage, S. R. (2019). Limited capabilities for condition-dependent modulation  
772 of vocal turn-taking behavior in marmoset monkeys. *Behavioral Neuroscience*, *133*(3), 320–  
773 328.
- 774 Elie, J. E., & Theunissen, F. E. (2020). The Neuroethology of Vocal Communication in  
775 Songbirds: Production and Perception of a Call Repertoire. In *The Neuroethology of*  
776 *Birdsong*. Springer.
- 777 Fee, M. S., Kozhevnikov, A. A., & Hahnloser, R. H. R. (2004). Neural Mechanisms of Vocal  
778 Sequence Generation in the Songbird. *Annals of the New York Academy of Sciences*,  
779 *1016*(1), 153–170. <https://doi.org/10.1196/annals.1298.022>



- 780 Fukushima, Y., & Aoki, K. (2000). The Role of the Dorsomedial Nucleus (DM) of  
781 Intercollicular Complex with Regard to Sexual Difference of Distance Calls in Bengalese  
782 Finches. *Zoological Science*, 17(9), 1231–1238. <https://doi.org/10.2108/zsj.17.1231>
- 783 Gill, L. F., Goymann, W., ter Maat, A., & Gahr, M. (2015). Patterns of call communication  
784 between group-housed zebra finches change during the breeding cycle. *ELife*, 4, e07770.  
785 <https://doi.org/10.7554/eLife.07770>
- 786 Hahnloser, R. H. R., Kozhevnikov, A. A., & Fee, M. S. (2002). An ultra-sparse code  
787 underlies the generation of neural sequences in a songbird. *Nature*, 419(6902), 65–70.  
788 <https://doi.org/10.1038/nature00974>
- 789 Hahnloser, R. H. R., Wang, C. Z.-H., Nager, A., & Naie, K. (2008). Spikes and Bursts in Two  
790 Types of Thalamic Projection Neurons Differentially Shape Sleep Patterns and Auditory  
791 Responses in a Songbird. *Journal of Neuroscience*, 28(19), 5040–5052.  
792 <https://doi.org/10.1523/JNEUROSCI.5059-07.2008>
- 793 Hamaguchi, K., Tanaka, M., & Mooney, R. (2016). A Distributed Recurrent Network  
794 Contributes to Temporally Precise Vocalizations. *Neuron*, 91(3), 680–693.  
795 <https://doi.org/10.1016/j.neuron.2016.06.019>
- 796 Immelmann, K. (1968). Zur biologischen Bedeutung des Estrildidengesanges. *Journal für*  
797 *Ornithologie*, 109, 284–299. <https://doi.org/10.1007/BF01678374>
- 798 Kornfeld, J., Benezra, S. E., Narayanan, R. T., Svara, F., Egger, R., Oberlaender, M., Denk,  
799 W., & Long, M. A. (2017). EM connectomics reveals axonal target variation in a sequence-  
800 generating network. *ELife*, 6. <https://doi.org/10.7554/eLife.24364>
- 801 Kosche, G., Vallentin, D., & Long, M. A. (2015). Interplay of Inhibition and Excitation Shapes  
802 a Premotor Neural Sequence. *Journal of Neuroscience*, 35(3), 1217–1227.  
803 <https://doi.org/10.1523/JNEUROSCI.4346-14.2015>
- 804 Levinson, S. C. (2016). Turn-taking in Human Communication – Origins and Implications for  
805 Language Processing. *Trends in Cognitive Sciences*, 20(1), 6–14.  
806 <https://doi.org/10.1016/j.tics.2015.10.010>
- 807 Lewandowski, B. C. (2011). *Production and Processing of Vocal Communication Signals in*  
808 *a Sensorimotor Nucleus of the Avian Song System*. University of Pennsylvania.
- 809 Lewandowski, B. C., Vyssotski, A., Hahnloser, R. H. R., & Schmidt, M. (2013). At the  
810 interface of the auditory and vocal motor systems: Nlf and its role in vocal processing,  
811 production and learning. *Journal of Physiology-Paris*, 107(3), 178–192.  
812 <https://doi.org/10.1016/j.jphysparis.2013.04.001>
- 813 Li, M., & Greenside, H. (2006). Stable propagation of a burst through a one-dimensional  
814 homogeneous excitatory chain model of songbird nucleus HVC. *Physical Review E*, 74(1),  
815 011918. <https://doi.org/10.1103/PhysRevE.74.011918>
- 816 Long, M. A., Jin, D. Z., & Fee, M. S. (2010). Support for a synaptic chain model of neuronal  
817 sequence generation. *Nature*, 468(7322), 394–399. <https://doi.org/10.1038/nature09514>
- 818 Lynch, G. F., Okubo, T. S., Hanuschkin, A., Hahnloser, R. H. R., & Fee, M. S. (2016).  
819 Rhythmic Continuous-Time Coding in the Songbird Analog of Vocal Motor Cortex. *Neuron*,  
820 90(4), 877–892. <https://doi.org/10.1016/j.neuron.2016.04.021>
- 821 Ma, S., Maat, A. ter, & Gahr, M. (2020). Neurotelemetry Reveals Putative Predictive Activity  
822 in HVC during Call-Based Vocal Communications in Zebra Finches. *Journal of*  
823 *Neuroscience*, 40(32), 6219–6227. <https://doi.org/10.1523/JNEUROSCI.2664-19.2020>

- 824 Mackevicius, E. L., Happ, M. T. L., & Fee, M. S. (2020). An avian cortical circuit for chunking  
825 tutor song syllables into simple vocal-motor units. *Nature Communications*, 11(1), 5029.  
826 <https://doi.org/10.1038/s41467-020-18732-x>
- 827 Margoliash, D. (1983). Acoustic parameters underlying the responses of song-specific  
828 neurons in the white-crowned sparrow. *The Journal of Neuroscience*, 3(5), 1039–1057.  
829 <https://doi.org/10.1523/JNEUROSCI.03-05-01039.1983>
- 830 Markowitz, J. E., Liberti III, W. A., Guitchounts, G., Velho, T., Lois, C., & Gardner, T. J.  
831 (2015). Mesoscopic Patterns of Neural Activity Support Songbird Cortical Sequences. *PLOS*  
832 *Biology*, 13(6), e1002158. <https://doi.org/10.1371/journal.pbio.1002158>
- 833 McCormick, D. A., Connors, B. W., Lighthall, J. W., & Prince, D. A. (1985). Comparative  
834 electrophysiology of pyramidal and sparsely spiny stellate neurons of the neocortex. *Journal*  
835 *of Neurophysiology*, 54(4), 782–806. <https://doi.org/10.1152/jn.1985.54.4.782>
- 836 Mooney, R., & Prather, J. F. (2005). The HVC Microcircuit: The Synaptic Basis for  
837 Interactions between Song Motor and Vocal Plasticity Pathways. *Journal of Neuroscience*,  
838 25(8), 1952–1964. <https://doi.org/10.1523/JNEUROSCI.3726-04.2005>
- 839 Nottebohm, F., Stokes, T. M., & Leonard, C. M. (1976). Central control of song in the canary,  
840 *Serinus canarius*. *Journal of Comparative Neurology*, 165(4), 457–486.  
841 <https://doi.org/10.1002/cne.901650405>
- 842 Okobi, D. E., Banerjee, A., Matheson, A. M. M., Phelps, S. M., & Long, M. A. (2019). Motor  
843 cortical control of vocal interaction in neotropical singing mice. *Science*, 363(6430), 983–  
844 988. <https://doi.org/10.1126/science.aau9480>
- 845 Okubo, T. S., Mackevicius, E. L., Payne, H. L., Lynch, G. F., & Fee, M. S. (2015). Growth  
846 and splitting of neural sequences in songbird vocal development. *Nature*, 528(7582), 352–  
847 357. <https://doi.org/10.1038/nature15741>
- 848 Picardo, M. A., Merel, J., Katlowitz, K. A., Vallentin, D., Okobi, D. E., Benezra, S. E., Clary,  
849 R. C., Pnevmatikakis, E. A., Paninski, L., & Long, M. A. (2016). Population-Level  
850 Representation of a Temporal Sequence Underlying Song Production in the Zebra Finch.  
851 *Neuron*, 90(4), 866–876. <https://doi.org/10.1016/j.neuron.2016.02.016>
- 852 Pika, S., Wilkinson, R., Kendrick, K. H., & Vernes, S. C. (2018). Taking turns: Bridging the  
853 gap between human and animal communication. *Proceedings of the Royal Society B:*  
854 *Biological Sciences*, 285(1880), 20180598. <https://doi.org/10.1098/rspb.2018.0598>
- 855 Rosen, M. J., & Mooney, R. (2006). Synaptic Interactions Underlying Song-Selectivity in the  
856 Avian Nucleus HVC Revealed by Dual Intracellular Recordings. *Journal of Neurophysiology*,  
857 95(2), 1158–1175. <https://doi.org/10.1152/jn.00100.2005>
- 858 Ross, M. T., Flores, D., Bertram, R., Johnson, F., & Hyson, R. L. (2017). Neuronal Intrinsic  
859 Physiology Changes During Development of a Learned Behavior. *ENeuro*, 4(5),  
860 ENEURO.0297-17.2017. <https://doi.org/10.1523/ENEURO.0297-17.2017>
- 861 Ross, M. T., Flores, D., Bertram, R., Johnson, F., Wu, W., & Hyson, R. L. (2019).  
862 Experience-Dependent Intrinsic Plasticity During Auditory Learning. *Journal of*  
863 *Neuroscience*, 39(7), 1206–1221. <https://doi.org/10.1523/JNEUROSCI.1036-18.2018>
- 864 Roth A, van Rossum MCW. Modeling synapses. In: De Schutter E, (Ed.). (2010)  
865 *Computational Modeling Methods for Neuroscientists*. MIT Press; Cambridge,  
866 Massachusetts
- 867 Scharff, C., & Nottebohm, F. (1991). A comparative study of the behavioral deficits following  
868 lesions of various parts of the zebra finch song system: Implications for vocal learning. *The*

- 869 *Journal of Neuroscience*, 11(9), 2896–2913. [https://doi.org/10.1523/JNEUROSCI.11-09-](https://doi.org/10.1523/JNEUROSCI.11-09-02896.1991)  
870 [02896.1991](https://doi.org/10.1523/JNEUROSCI.11-09-02896.1991)
- 871 Shaevitz, S. S., & Theunissen, F. E. (2007). Functional Connectivity Between Auditory Areas  
872 Field L and CLM and Song System Nucleus HVC in Anesthetized Zebra Finches. *Journal of*  
873 *Neurophysiology*, 98(5), 2747–2764. <https://doi.org/10.1152/jn.00294.2007>
- 874 Shaughnessy, D. W., Hyson, R. L., Bertram, R., Wu, W., & Johnson, F. (2019). Female  
875 zebra finches do not sing yet share neural pathways necessary for singing in males. *Journal*  
876 *of Comparative Neurology*, 527(4), 843–855. <https://doi.org/10.1002/cne.24569>
- 877 Stimberg, M., Brette, R., & Goodman, D. F. (2019). Brian 2, an intuitive and efficient neural  
878 simulator. *ELife*, 8, e47314. <https://doi.org/10.7554/eLife.47314>
- 879 Stivers, T., Enfield, N. J., Brown, P., Englert, C., Hayashi, M., Heinemann, T., Hoymann, G.,  
880 Rossano, F., Ruitter, J. P. de, Yoon, K.-E., & Levinson, S. C. (2009). Universals and cultural  
881 variation in turn-taking in conversation. *Proceedings of the National Academy of Sciences*,  
882 106(26), 10587–10592. <https://doi.org/10.1073/pnas.0903616106>
- 883 Takahashi, D. Y., Narayanan, D. Z., & Ghazanfar, A. A. (2013). Coupled Oscillator  
884 Dynamics of Vocal Turn-Taking in Monkeys. *Current Biology*, 23(21), 2162–2168.  
885 <https://doi.org/10.1016/j.cub.2013.09.005>
- 886 Takahashi, D. Y., Fenley, A. R., & Ghazanfar, A. A. (2016). Early development of turn-taking  
887 with parents shapes vocal acoustics in infant marmoset monkeys. *Philosophical*  
888 *Transactions of the Royal Society B: Biological Sciences*, 371(1693), 20150370.  
889 <https://doi.org/10.1098/rstb.2015.0370>
- 890 Tchernichovski, O., Mitra, P. P., Lints, T., & Nottebohm, F. (2001). Dynamics of the Vocal  
891 Imitation Process: How a Zebra Finch Learns Its Song. *Science*, 291(5513), 2564–2569.  
892 <https://doi.org/10.1126/science.1058522>
- 893 Ter Maat, A., Trost, L., Sagunsky, H., Seltmann, S., & Gahr, M. (2014). Zebra Finch Mates  
894 Use Their Forebrain Song System in Unlearned Call Communication. *PLOS ONE*, 9(10),  
895 e109334. <https://doi.org/10.1371/journal.pone.0109334>
- 896 Vallentin, D., & Long, M. A. (2015). Motor Origin of Precise Synaptic Inputs onto Forebrain  
897 Neurons Driving a Skilled Behavior. *Journal of Neuroscience*, 35(1), 299–307.  
898 <https://doi.org/10.1523/JNEUROSCI.3698-14.2015>
- 899 Vallentin, D., Kosche, G., Lipkind, D., & Long, M. A. (2016). Inhibition protects acquired song  
900 segments during vocal learning in zebra finches. *Science*, 351(6270), 267–271.  
901 <https://doi.org/10.1126/science.aad3023>
- 902 Vicario, D. S., & Simpson, H. B. (1995). Electrical stimulation in forebrain nuclei elicits  
903 learned vocal patterns in songbirds. *Journal of Neurophysiology*, 73(6), 2602–2607.  
904 <https://doi.org/10.1152/jn.1995.73.6.2602>
- 905 Vogels, T. P., Sprekeler, H., Zenke, F., Clopath, C., & Gerstner, W. (2011). Inhibitory  
906 Plasticity Balances Excitation and Inhibition in Sensory Pathways and Memory Networks.  
907 *Science*, 334(6062), 1569–1573. <https://doi.org/10.1126/science.1211095>
- 908 Wild, J. M., Williams, M. N., Howie, G. J., & Mooney, R. (2005). Calcium-binding proteins  
909 define interneurons in HVC of the zebra finch (*Taeniopygia guttata*). *Journal of Comparative*  
910 *Neurology*, 483(1), 76–90. <https://doi.org/10.1002/cne.20403>
- 911 Zann, R. A. (1996). *The Zebra Finch: A Synthesis of Field and Laboratory Studies*. Oxford  
912 University Press.
- 913

914 **SUPPLEMENTS**

915

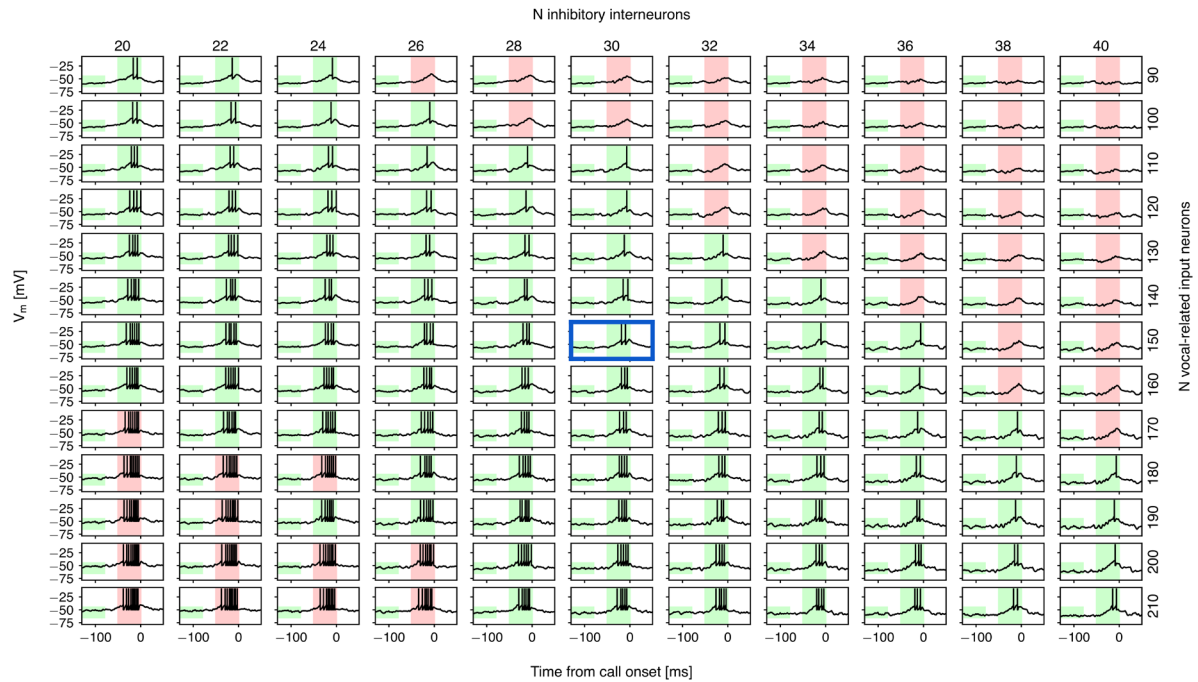

916

917 **Figure S1 – Sensitivity analysis for the Feed-Forward Phasic Inhibition model: population sizes.** Membrane  
918 potential traces of the model premotor neuron in dependence on the number of inhibitory interneurons (left to right)  
919 and vocal-related input neurons (top to bottom). The colored rectangles show whether two criteria are fulfilled  
920 (green) or violated (red) in the different simulations: First (left rectangle in each panel), that the baseline membrane  
921 potential (average potential between 130 and 80 ms prior to call onset) is in the range of the recorded premotor  
922 neurons. This range is between 5 and 25 mV below spike threshold (see e.g. Figure 1E), which corresponds to -  
923 65 – -45 mV in the model. Second (right rectangle in each panel), that the neuron produces between one and six  
924 spikes during the 50 ms prior to call onset, as was observed in the recorded premotor neurons. The blue frame  
925 marks the parameter combination used in the simulations (30 interneurons, 150 vocal-related input neurons).

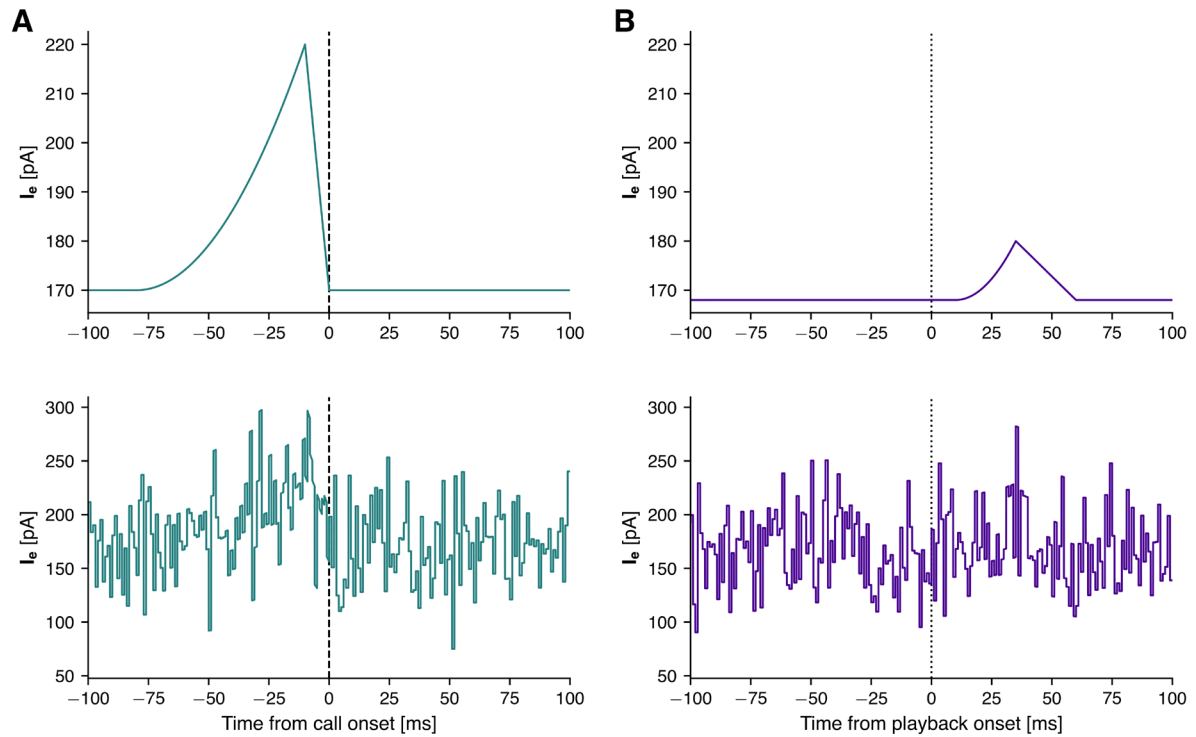

926

927

928

929

930

**Figure S2 – Example input currents to the upstream populations. (A)** Input current to a neuron in the vocal-related input population, before (top) and after adding a time-varying randomized offset (bottom). **(B)** Same for the auditory-related input population.

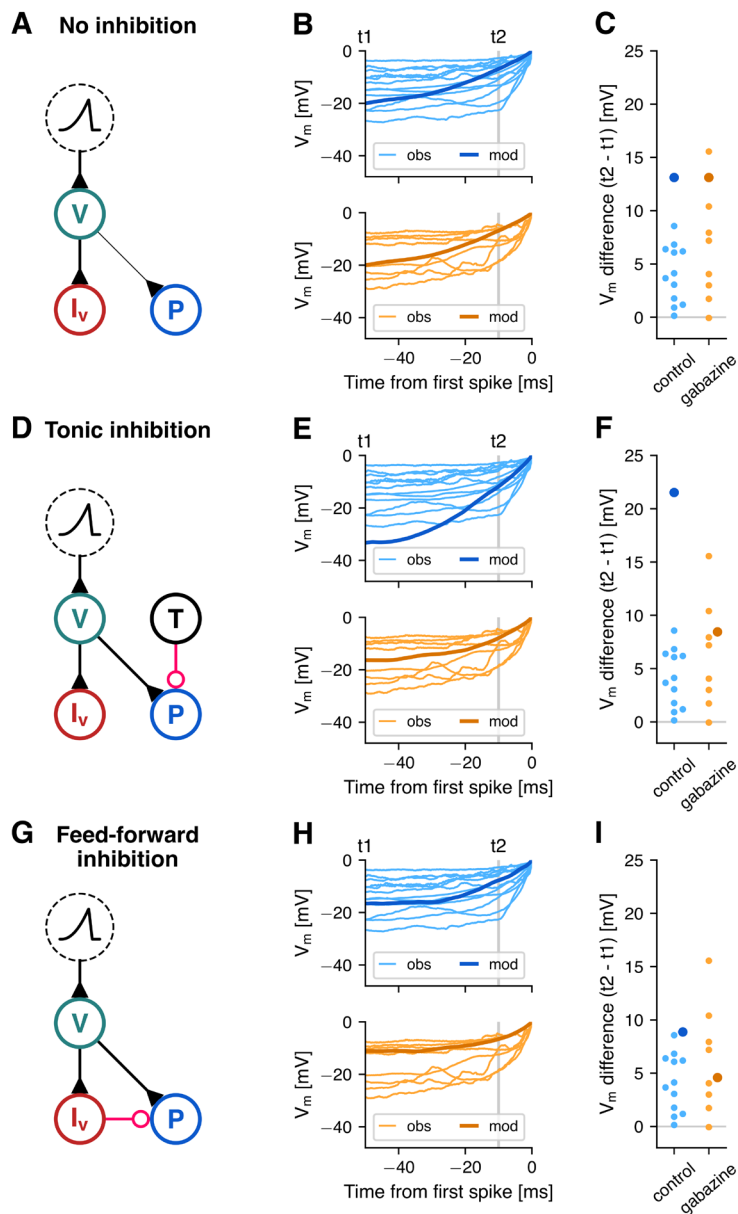

931

932 **Figure S3 – Comparison of pre-burst subthreshold potential between modeled and observed**  
 933 **premotor neurons** – (A, D, G) Circuit diagrams of the three model variants introduced in Figure 2. (B, E, H)  
 934 Ramping subthreshold membrane potential of the twelve observed HVC premotor neurons that burst around call  
 935 onset during the control (light blue, top) and gabazine condition (light orange, bottom), as well as the model  
 936 premotor neuron at -19pA (dark blue, top) and -7pA inhibitory weights (dark orange, bottom) in the No Inhibition  
 937 (B), Tonic Inhibition (E) and Feed-Forward Phasic Inhibition (H) models. Traces are aligned to the time point and  
 938 the membrane potential of their first spike onset (0 ms; 0 mV). Observed traces were averaged across trials and  
 939 the model traces were averaged across 100 simulations, each with different randomized amplitude offsets in the  
 940 input current onto the vocal-related input neurons. (C, F, I) Comparison of the differences in membrane potential  
 941 between 10 ms (t2) and 50 ms before burst onset (t1) for observed (small, light-colored dots) and model premotor  
 942 neurons (large, dark-colored dots).

943

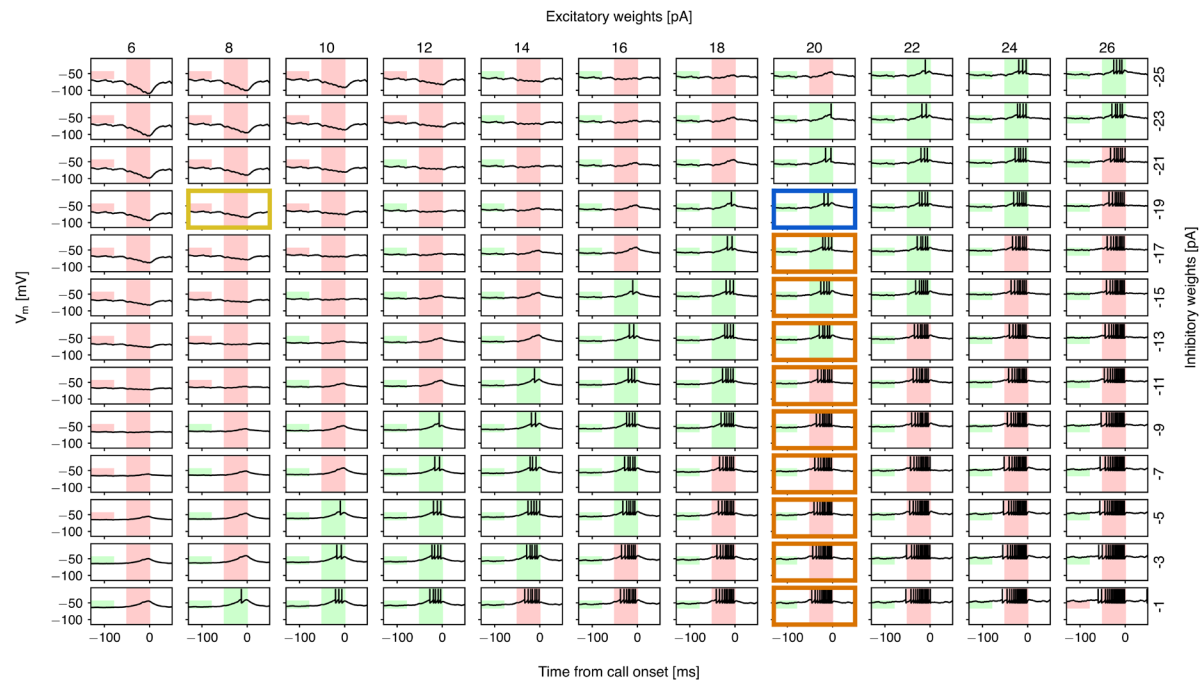

944

945 **Figure S4 – Sensitivity analysis for the Feed-forward inhibition model: synaptic weights.** Membrane potential  
 946 traces of the model premotor neuron in dependence on the weights of its excitatory (left to right) and inhibitory  
 947 inputs (bottom to top). The colored rectangles show whether two criteria are fulfilled (green) or violated (red) in the  
 948 different simulations: First (left rectangle in each panel), that the baseline membrane potential (average potential  
 949 between 130 and 80 ms prior to call onset) is in the range of the recorded premotor neurons. This range is between  
 950 5 and 25 mV below spike threshold (see e.g. Figure 1E), which corresponds to -65 – -45 mV in the model. Second  
 951 (right rectangle in each panel), that the neuron produces between one and six spikes during the 50ms prior to call  
 952 onset, as was observed in the recorded premotor neurons. Colored frames mark the parameter combinations used  
 953 in the simulations. Yellow (8 pA, -19 pA): silent premotor neuron; Blue (20 pA, -19 pA): bursting premotor neuron;  
 954 Orange (20 pA, -17 – -1 pA): reduced inhibitory weights in Figure 2E–F.

955

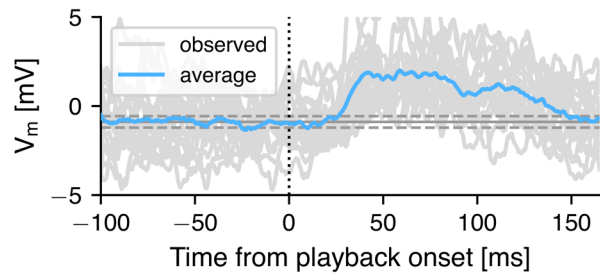

**Figure S5 – Intracellular recordings of an example premotor neuron aligned to playback onset (dotted line), which is significantly depolarized following playback onset.** Horizontal lines show mean baseline potential  $\pm$  2 standard deviations (baseline: -100–0 ms).



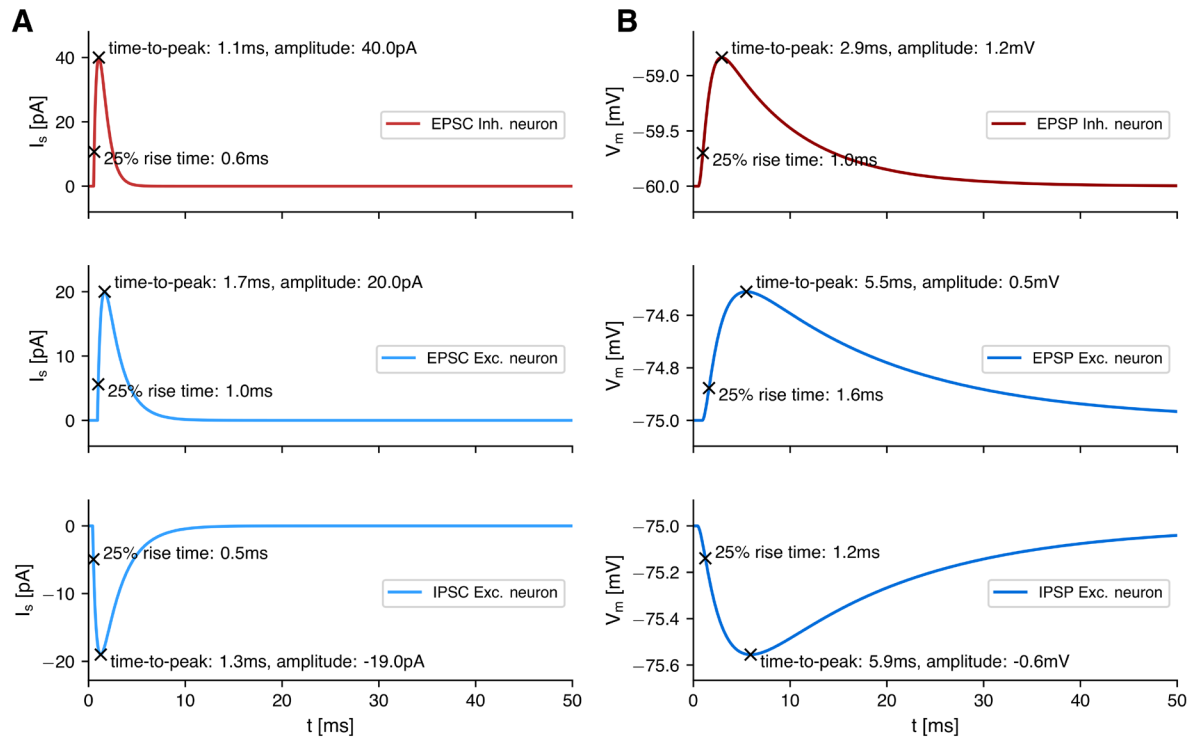

962

963

964

965

**Figure S6 – Postsynaptic currents and potentials. (A)** Excitatory and inhibitory postsynaptic currents (EPSC/IPSC) onto an inhibitory (top) and an excitatory model neuron (middle, bottom) after a single presynaptic spike at time  $t=0$ . **(B)** Resulting postsynaptic potentials (EPSP/IPSP) in model neurons at rest.

966

967

968
